# Supplementary material
Source: PubMed Central journal article supplement (PMC3674050)
Supplement: epi-8-409-s01.pdf [file epi-8-409-s01.pdf]

## **Supplemental Material to:**

**Natalia Kisseljova, Tatyana Ivanova, Alexey A. Dmitriev,  
George S. Krasnov, Anna V. Kudryavtseva, Grigory  
Panassenko, Evgeny Tsitrin, Michael Lerman, Fyodor  
Kissel'ov, Vladimir Kashuba, Eugene R. Zabarovsky and  
Vera N. Senchenko**

**Novel tumor suppressor candidates on chromosome 3  
revealed by NotI-microarrays in cervical cancer**

**Epigenetics 2012; 8(4)**

**<http://dx.doi.org/10.4161/epi.24233>**

**[http://www.landesbioscience.com/journals/epigenetics/  
article/24233/](http://www.landesbioscience.com/journals/epigenetics/article/24233/)**

**Table S1.** Summary hybridization data of 48 cervical samples to NotI-microarrays.

\* - gene names separated by “/” mean that NotI-site is common for these two genes.

| №  | NotI-site        | Gene*            | Gene Localization | Homozygous Del/Met |     | Hemizygous Del/Met |      |
|----|------------------|------------------|-------------------|--------------------|-----|--------------------|------|
|    |                  |                  |                   | N                  | %   | N                  | %    |
| 1  | NL6-FJ5R (C)     | LRRN1            | 3p26.2            | 1                  | 2.1 | 20                 | 41.7 |
| 2  | NR5-IH18RS       | BHLHE40          | 3p26.1            | 0                  | 0.0 | 13                 | 27.1 |
| 3  | NR5-GP13R (C)    | LMCD1            | 3p26-24           | 2                  | 4.2 | 4                  | 8.3  |
| 4  | NL2B001R (D)     | LOC440944/SETD5  | 3p25.3            | 0                  | 0.0 | 1                  | 2.1  |
| 5  | NL1-BH17R (C)    | LHFPL4/MTMR14    | 3p25.3            | 0                  | 0.0 | 3                  | 6.3  |
| 6  | NR1-WA8R (C)     | IL17RE           | 3p25.3            | 0                  | 0.0 | 2                  | 4.2  |
| 7  | NL1106R (D)      | IL17RC           | 3p25.3            | 0                  | 0.0 | 1                  | 2.1  |
| 8  | NRLA404R (U)     | VHL              | 3p25.3            | 1                  | 2.1 | 16                 | 33.3 |
| 9  | NRLa098R (S)     | IRAK2            | 3p25.3            | 0                  | 0.0 | 1                  | 2.1  |
| 10 | NLMA188R (D)     | TSEN2            | 3p25.2            | 0                  | 0.0 | 0                  | 0.0  |
| 11 | NR1-NK17R (C)    | CAND2            | 3p25.2            | 0                  | 0.0 | 1                  | 2.1  |
| 12 | HSJ4-AB7R (C)    | RPL32/IQSEC1     | 3p25.2            | 0                  | 0.0 | 10                 | 20.8 |
| 13 | NLMP217R (D)     | IQSEC1           | 3p25.2            | 0                  | 0.0 | 2                  | 4.2  |
| 14 | NR1-XM13C        | IQSEC1           | 3p25.2            | 0                  | 0.0 | 15                 | 31.3 |
| 15 | NRL2062R (D)     | NUP210           | 3p25.1            | 0                  | 0.0 | 3                  | 6.3  |
| 16 | NR1-KJ5R (C)     | FBLN2            | 3p25.1            | 0                  | 0.0 | 7                  | 14.6 |
| 17 | NL1-VJ14R (C)    | LOC285375        | 3p25.1            | 0                  | 0.0 | 1                  | 2.1  |
| 18 | NR1-PL22R (C)    | LOC285375        | 3p25.1            | 0                  | 0.0 | 10                 | 20.8 |
| 19 | NL4-BK12R (C)    | WNT7A            | 3p25              | 0                  | 0.0 | 11                 | 22.9 |
| 20 | NLMP199R (D)     | GRIP2/C3orf19    | 3p25.1            | 0                  | 0.0 | 2                  | 4.2  |
| 21 | NL4-DP2RS        | FGD5             | 3p25.1            | 0                  | 0.0 | 10                 | 20.8 |
| 22 | NL1A177R (143D)  | SH3BP5           | 3p24.3            | 0                  | 0.0 | 0                  | 0.0  |
| 23 | APC1R            | EAF1/METTL6      | 3p25.1            | 0                  | 0.0 | 0                  | 0.0  |
| 24 | NL1G261R (D)     | ANKRD28          | 3p25.1            | 0                  | 0.0 | 0                  | 0.0  |
| 25 | NR1-AB20R (C)    | ANKRD28          | 3p25.1            | 1                  | 2.1 | 4                  | 8.3  |
| 26 | NL4-AP18R (C)    | PLCL2            | 3p24.3            | 0                  | 0.0 | 12                 | 25.0 |
| 27 | NL1-GC10C        | HMGB1L5 (Pseudo) | 3p24              | 0                  | 0.0 | 4                  | 8.3  |
| 28 | NR1-WF18R (C)    | UBE2E2           | 3p24.2            | 1                  | 2.1 | 10                 | 20.8 |
| 29 | NL1-CJ4R (C)     | NKIRAS1/RPL15    | 3p24.2            | 0                  | 0.0 | 18                 | 37.5 |
| 30 | NL1-DG8R         | THRB             | 3p24.2            | 0                  | 0.0 | 2                  | 4.2  |
| 31 | NR1-KA8R (C)     | THRB             | 3p24.2            | 4                  | 8.3 | 0                  | 0.0  |
| 32 | NL4-BB6R (C)     | THRB             | 3p24.2            | 4                  | 8.3 | 7                  | 14.6 |
| 33 | NL3-CA11RS       | LRRC3B           | 3p24              | 2                  | 4.2 | 17                 | 35.4 |
| 34 | NRLa082R (D)     | STT3B            | 3p23              | 0                  | 0.0 | 3                  | 6.3  |
| 35 | NR5-FH23R (C)    | STT3B            | 3p23              | 0                  | 0.0 | 3                  | 6.3  |
| 36 | NL124R (D)       | OSBPL10/ZNF860   | 3p22.3            | 0                  | 0.0 | 0                  | 0.0  |
| 37 | NR5-FK11R (C)    | CMTM8            | 3p22.3            | 0                  | 0.0 | 3                  | 6.3  |
| 38 | NRL-063R (D)     | CMTM6            | 3p22.3            | 1                  | 2.1 | 5                  | 10.4 |
| 39 | NR1-EP7RS        | CLASP2           | 3p22.3            | 0                  | 0.0 | 3                  | 6.3  |
| 40 | NLMZ142R (D)     | TRANK1           | 3p22.2            | 0                  | 0.0 | 0                  | 0.0  |
| 41 | NL1A401R (D)     | ITGA9            | 3p21.3            | 2                  | 4.2 | 18                 | 37.5 |
| 42 | NLJ-003RD        | CTDSPL           | 3p21.3            | 1                  | 2.1 | 14                 | 29.2 |
| 43 | NL3a019r (d)     | SLC22A13         | 3p21.3            | 0                  | 0.0 | 0                  | 0.0  |
| 44 | AP20D (NLMP220D) | SCN5A            | 3p21              | 0                  | 0.0 | 0                  | 0.0  |
| 45 | NL3003R (U)      | GORASP1/TTC21A   | 3p22-p21.33       | 0                  | 0.0 | 14                 | 29.2 |

|    |               |               |                |   |            |    |             |
|----|---------------|---------------|----------------|---|------------|----|-------------|
| 46 | NL1308R (D)   | MOBP          | 3p22.1         | 2 | <b>4.2</b> | 4  | <b>8.3</b>  |
| 47 | NR1-NK20R (C) | EIF1B         | 3p22.1         | 0 | <b>0.0</b> | 0  | <b>0.0</b>  |
| 48 | NR5-IB17R (C) | HIGD1A        | 3p22.1         | 0 | <b>0.0</b> | 3  | <b>6.3</b>  |
| 49 | NR1-PA6R (C)  | FAM198A       | 3p22.1         | 0 | <b>0.0</b> | 4  | <b>8.3</b>  |
| 50 | NL3A009R (D)  | SNRK          | 3p22.1         | 1 | <b>2.1</b> | 4  | <b>8.3</b>  |
| 51 | NL1232R (S)   | ABHD5         | 3p21           | 0 | <b>0.0</b> | 1  | <b>2.1</b>  |
| 52 | NR1-AN24RS    | ABHD5/C3orf77 | 3p21           | 0 | <b>0.0</b> | 12 | <b>25.0</b> |
| 53 | NL2B007R (D)  | ZDHHC3/EXOSC7 | 3p21.31        | 0 | <b>0.0</b> | 2  | <b>4.2</b>  |
| 54 | NL1320R (S)   | SACM1L        | 3p21.3         | 0 | <b>0.0</b> | 2  | <b>4.2</b>  |
| 55 | NL3A010R (D)  | SLC6A20       | 3p21.3         | 0 | <b>0.0</b> | 2  | <b>4.2</b>  |
| 56 | NLM-067R (D)  | PRSS42/MYL3   | 3p21.31        | 0 | <b>0.0</b> | 7  | <b>14.6</b> |
| 57 | NL3A006R (D)  | NBEAL2        | 3p21.31        | 1 | <b>2.1</b> | 6  | <b>12.5</b> |
| 58 | NR1-NJ3R (C)  | CSPG5         | 3p21.3         | 0 | <b>0.0</b> | 0  | <b>0.0</b>  |
| 59 | J31A212R      | DHX30         | 3p21.31        | 0 | <b>0.0</b> | 2  | <b>4.2</b>  |
| 60 | J31A219D      | MAP4          | 3p21           | 0 | <b>0.0</b> | 0  | <b>0.0</b>  |
| 61 | NR1-KF21R (C) | MAP4          | 3p21           | 0 | <b>0.0</b> | 0  | <b>0.0</b>  |
| 62 | NR1-PM22R (C) | SHISA5        | 3p21.31        | 0 | <b>0.0</b> | 2  | <b>4.2</b>  |
| 63 | NL6-II3R      | USP19         | 3p21.31        | 0 | <b>0.0</b> | 0  | <b>0.0</b>  |
| 64 | NL3A014R (D)  | RHOA/TCTA     | 3p21.3         | 0 | <b>0.0</b> | 2  | <b>4.2</b>  |
| 65 | J32Z148D      | RHOA/TCTA     | 3p21           | 0 | <b>0.0</b> | 0  | <b>0.0</b>  |
| 66 | NRL1          | SEMA3F        | 3p21.3         | 0 | <b>0.0</b> | 0  | <b>0.0</b>  |
| 67 | NL3A001R (D)  | GNAI2         | 3p21.31        | 1 | <b>2.1</b> | 6  | <b>12.5</b> |
| 68 | NL1G210R (D)  | MAPKAPK3      | 3p21.3         | 0 | <b>0.0</b> | 1  | <b>2.1</b>  |
| 69 | NL1Z216R (D)  | MANF          | 3p21.1         | 0 | <b>0.0</b> | 0  | <b>0.0</b>  |
| 70 | NRLA097R      | RBM15B        | 3p21.2         | 0 | <b>0.0</b> | 1  | <b>2.1</b>  |
| 71 | NR1-WH9R (C)  | RRP9/PARP3    | 3p21.2         | 0 | <b>0.0</b> | 1  | <b>2.1</b>  |
| 72 | NRLA113R (D)  | GPR62         | 3p21.1         | 0 | <b>0.0</b> | 1  | <b>2.1</b>  |
| 73 | NLM252R (D)   | PCBP4         | 3p21           | 0 | <b>0.0</b> | 0  | <b>0.0</b>  |
| 74 | NL1243R (D)   | ABHD14A       | 3p21.1         | 0 | <b>0.0</b> | 0  | <b>0.0</b>  |
| 75 | NL1245R (D)   | ACY1          | 3p21.1         | 0 | <b>0.0</b> | 0  | <b>0.0</b>  |
| 76 | NR1-NC7RS     | PPM1M         | 3p21.2         | 0 | <b>0.0</b> | 2  | <b>4.2</b>  |
| 77 | NL2G008R (D)  | WDR82         | 3p21.2         | 0 | <b>0.0</b> | 0  | <b>0.0</b>  |
| 78 | AP32R (D)     | PHF7/BAP1     | 3p21.1         | 0 | <b>0.0</b> | 1  | <b>2.1</b>  |
| 79 | NRL-143D      | GLT8D1/SPCS1  | 3p21.1         | 0 | <b>0.0</b> | 0  | <b>0.0</b>  |
| 80 | NR1-DH18RS    | CACNA2D3      | 3p21.1         | 0 | <b>0.0</b> | 2  | <b>4.2</b>  |
| 81 | NRL091R (S)   | C3orf63       | 3p14.3         | 0 | <b>0.0</b> | 0  | <b>0.0</b>  |
| 82 | AP2R (D)      | ARF4          | 3p21.2 - p21.1 | 0 | <b>0.0</b> | 0  | <b>0.0</b>  |
| 83 | NLMP223R (D)  | ABHD6         | 3p14.3         | 0 | <b>0.0</b> | 1  | <b>2.1</b>  |
| 84 | NL1A358R (D)  | ATXN7/THOC7   | 3p21.1-p12     | 0 | <b>0.0</b> | 0  | <b>0.0</b>  |
| 85 | NR1-NJ9R (C)  | PRICKLE2      | 3p14.1         | 1 | <b>2.1</b> | 20 | <b>41.7</b> |
| 86 | NR5-FL20R (C) | LRIG1         | 3p14           | 0 | <b>0.0</b> | 3  | <b>6.3</b>  |
| 87 | NL1-ZP13R (C) | KBTBD8        | 3p14           | 1 | <b>2.1</b> | 2  | <b>4.2</b>  |
| 88 | NL4-BN15R (C) | FAM19A4       | 3p14.1         | 0 | <b>0.0</b> | 8  | <b>16.7</b> |
| 89 | NL2B063R (D)  | FRMD4B/MITF   | 3p14.1         | 0 | <b>0.0</b> | 0  | <b>0.0</b>  |
| 90 | NL1-YL16RS    | MITF          | 3p14.2-p14.1   | 0 | <b>0.0</b> | 5  | <b>10.4</b> |
| 91 | NL1-BA6R      | FOXP1         | 3p14.1         | 0 | <b>0.0</b> | 14 | <b>29.2</b> |
| 92 | NL6-AF21R (C) | PDZRN3        | 3p13           | 1 | <b>2.1</b> | 15 | <b>31.3</b> |
| 93 | 924Z021R (D)  | FRG2C         | 3p12.3         | 0 | <b>0.0</b> | 0  | <b>0.0</b>  |
| 94 | NR5-GE23R (C) | ROBO2         | 3p12.3         | 0 | <b>0.0</b> | 2  | <b>4.2</b>  |
| 95 | NL6-HG15R (C) | ROBO1         | 3p12.1         | 1 | <b>2.1</b> | 4  | <b>8.3</b>  |
| 96 | NR1-WE11RS    | CGGBP1        | 3p12-p11.1     | 0 | <b>0.0</b> | 13 | <b>27.1</b> |
| 97 | NR5-FK16RS    | MINA          | 3q11.2         | 2 | <b>4.2</b> | 5  | <b>10.4</b> |

|     |                    |                |            |   |             |    |             |
|-----|--------------------|----------------|------------|---|-------------|----|-------------|
| 98  | NL6-F020R (C)      | DCBLD2         | 3q12.1;3   | 0 | <b>0.0</b>  | 4  | <b>8.3</b>  |
| 99  | NLMA202R (D)       | NIT2           | 3q12.2     | 0 | <b>0.0</b>  | 1  | <b>2.1</b>  |
| 100 | NL1268R (P65D)     | TMEM45A        | 3q12.2     | 0 | <b>0.0</b>  | 0  | <b>0.0</b>  |
| 101 | 924Z094R (D)       | TFG            | 3q12.2     | 0 | <b>0.0</b>  | 0  | <b>0.0</b>  |
| 102 | NLMZ(A)134R(S)     | BBX            | 3q13.1     | 0 | <b>0.0</b>  | 1  | <b>2.1</b>  |
| 103 | NL3-CI2R (C)       | LOC285205      | 3q13.12    | 0 | <b>0.0</b>  | 9  | <b>18.8</b> |
| 104 | NLM187R (D)        | BOC            | 3q13.2     | 0 | <b>0.0</b>  | 1  | <b>2.1</b>  |
| 105 | NL2273R (D)        | B4GALT4        | 3q13.3     | 0 | <b>0.0</b>  | 0  | <b>0.0</b>  |
| 106 | NR1-WD23R (C)      | LRRC58         | 3q13.33    | 0 | <b>0.0</b>  | 1  | <b>2.1</b>  |
| 107 | NR5-FG18R (C)      | FSTL1          | 3q13.33    | 1 | <b>2.1</b>  | 3  | <b>6.3</b>  |
| 108 | NL2B006R (D)       | SEMA5B         | 3q21.1     | 0 | <b>0.0</b>  | 1  | <b>2.1</b>  |
| 109 | NL1-GK21R (C)      | ROPN1/KALRN    | 3q13.3     | 0 | <b>0.0</b>  | 9  | <b>18.8</b> |
| 110 | NR5-CD6R (C)       | ITGB5          | 3q21.2     | 0 | <b>0.0</b>  | 1  | <b>2.1</b>  |
| 111 | NL4-BC8R (C)       | ALDH1L1        | 3q21.3     | 0 | <b>0.0</b>  | 11 | <b>22.9</b> |
| 112 | NL1290R (D)        | CHST13         | 3q21.3     | 0 | <b>0.0</b>  | 8  | <b>16.7</b> |
| 113 | NL1-YJ5R (C)       | C3orf46/CHCHD6 | 3q21.3     | 0 | <b>0.0</b>  | 9  | <b>18.8</b> |
| 114 | NR1-NK11R (C)      | CHCHD6         | 3q21.3     | 0 | <b>0.0</b>  | 5  | <b>10.4</b> |
| 115 | NL2A230R           | ABTB1/PODXL2   | 3q21       | 0 | <b>0.0</b>  | 2  | <b>4.2</b>  |
| 116 | NL1-DE18R          | GATA2          | 3q21.3     | 0 | <b>0.0</b>  | 3  | <b>6.3</b>  |
| 117 | NL4-BH3R (C)       | GATA2          | 3q21.3     | 0 | <b>0.0</b>  | 6  | <b>12.5</b> |
| 118 | NR5-IG11RS         | C3orf27        | 3q21       | 0 | <b>0.0</b>  | 0  | <b>0.0</b>  |
| 119 | NL2B023R (NLMP23D) | C3orf27        | 3q21       | 0 | <b>0.0</b>  | 0  | <b>0.0</b>  |
| 120 | AP4R (D)           | RPN1           | 3q21.3     | 0 | <b>0.0</b>  | 0  | <b>0.0</b>  |
| 121 | NRL084R (D)        | RPN1/RAB7A     | 3q21.3     | 0 | <b>0.0</b>  | 0  | <b>0.0</b>  |
| 122 | NLMP7R (D)         | RAB7A          | 3q21.3     | 0 | <b>0.0</b>  | 0  | <b>0.0</b>  |
| 123 | NR1-PH14R (C)      | KIAA1257       | 3q21.3     | 0 | <b>0.0</b>  | 1  | <b>2.1</b>  |
| 124 | NR1-EP10R (C)      | PLXND1         | 3q22.1     | 0 | <b>0.0</b>  | 0  | <b>0.0</b>  |
| 125 | NL1P9R (Z206D)     | TMCC1          | 3q22.1     | 0 | <b>0.0</b>  | 0  | <b>0.0</b>  |
| 126 | NL4-DJ11RS         | TRH            | 3q13.3-q21 | 0 | <b>0.0</b>  | 9  | <b>18.8</b> |
| 127 | NR1-WD21R (C)      | NEK11/NUDT16   | 3q22.1     | 5 | <b>10.4</b> | 3  | <b>6.3</b>  |
| 128 | AP45R (NLMZ073D)   | TMEM108        | 3q21       | 0 | <b>0.0</b>  | 2  | <b>4.2</b>  |
| 129 | NRL124R (D)        | TOPBP1         | 3q22.1     | 0 | <b>0.0</b>  | 0  | <b>0.0</b>  |
| 130 | NR5-IG2R (C)       | KY             | 3q22.2     | 0 | <b>0.0</b>  | 3  | <b>6.3</b>  |
| 131 | NL1A079R (D)       | EPHB1          | 3q21-q23   | 0 | <b>0.0</b>  | 13 | <b>27.1</b> |
| 132 | NL1-FK10R (C)      | PPP2R3A        | 3q22.1     | 2 | <b>4.2</b>  | 8  | <b>16.7</b> |
| 133 | NL2G249R (D)       | NCK1           | 3q21       | 0 | <b>0.0</b>  | 0  | <b>0.0</b>  |
| 134 | NR1-WJ2RS          | SOX14          | 3q22-q23   | 0 | <b>0.0</b>  | 10 | <b>20.8</b> |
| 135 | NR1-WL7R (C)       | DZIP1L         | 3q22.3     | 0 | <b>0.0</b>  | 1  | <b>2.1</b>  |
| 136 | NL1-DJ10R (C)      | ARMC8          | 3q22.3     | 0 | <b>0.0</b>  | 0  | <b>0.0</b>  |
| 137 | NL1A278R (D)       | MRAS           | 3q22.3     | 0 | <b>0.0</b>  | 0  | <b>0.0</b>  |
| 138 | NR1-NO14R (C)      | FOXL2/C3orf72  | 3q23       | 0 | <b>0.0</b>  | 0  | <b>0.0</b>  |
| 139 | NL1-YD3R (C)       | ACPL2          | 3q23       | 0 | <b>0.0</b>  | 3  | <b>6.3</b>  |
| 140 | NR5-KB9R (C)       | GK5            | 3q23       | 0 | <b>0.0</b>  | 0  | <b>0.0</b>  |
| 141 | NL6-FB5R (C)       | PAQR9          | 3q23       | 0 | <b>0.0</b>  | 1  | <b>2.1</b>  |
| 142 | NR5-IO11R (C)      | PAQR9          | 3q23       | 1 | <b>2.1</b>  | 2  | <b>4.2</b>  |
| 143 | NR1-OG4R (C)       | SLC9A9/C3orf58 | 3q24       | 0 | <b>0.0</b>  | 0  | <b>0.0</b>  |
| 144 | NR1-PD1R           | ZIC4           | 3q24       | 1 | <b>2.1</b>  | 11 | <b>22.9</b> |
| 145 | NL2Z262R (221S)    | SIAH2          | 3q25       | 0 | <b>0.0</b>  | 0  | <b>0.0</b>  |
| 146 | NL4-BI4RS          | RAP2B          | 3q25.2     | 0 | <b>0.0</b>  | 8  | <b>16.7</b> |
| 147 | NL1-VC9R (C)       | GPR149         | 3q25.2     | 1 | <b>2.1</b>  | 2  | <b>4.2</b>  |
| 148 | NRL090R (S)        | GMPS           | 3q24       | 0 | <b>0.0</b>  | 4  | <b>8.3</b>  |
| 149 | NRLZ271R (D)       | SSR3           | 3q25.31    | 0 | <b>0.0</b>  | 0  | <b>0.0</b>  |

|     |               |                     |                  |   |            |    |             |
|-----|---------------|---------------------|------------------|---|------------|----|-------------|
| 150 | NR1-NM7R (C)  | B3GALNT1            | 3q25             | 0 | <b>0.0</b> | 3  | <b>6.3</b>  |
| 151 | NLMP208R (D)  | FNDC3B              | 3q26.31          | 0 | <b>0.0</b> | 0  | <b>0.0</b>  |
| 152 | NRLa114R (D)  | TBL1XR1             | 3q26.32          | 0 | <b>0.0</b> | 1  | <b>2.1</b>  |
| 153 | NLMP137R (D)  | PIK3CA              | 3q26.3           | 0 | <b>0.0</b> | 1  | <b>2.1</b>  |
| 154 | NL1-ZD4R      | SOX2                | 3q26.3-27        | 0 | <b>0.0</b> | 6  | <b>12.5</b> |
| 155 | 924A053R (D)  | ATP11B              | 3q27             | 0 | <b>0.0</b> | 0  | <b>0.0</b>  |
| 156 | NLMP224R (D)  | ATP11B              | 3q27             | 0 | <b>0.0</b> | 0  | <b>0.0</b>  |
| 157 | NLMP91R (D)   | LAMP3               | 3q26.3-q27       | 0 | <b>0.0</b> | 0  | <b>0.0</b>  |
| 158 | NL1-BM8R (C)  | B3GNT5/MCF2L2       | 3q28             | 0 | <b>0.0</b> | 2  | <b>4.2</b>  |
| 159 | NR5-CM3R (C)  | PARL                | 3q27.1           | 0 | <b>0.0</b> | 2  | <b>4.2</b>  |
| 160 | NL2B011R (D)  | ABCC5               | 3q27             | 0 | <b>0.0</b> | 0  | <b>0.0</b>  |
| 161 | NRL117R (D)   | VWA5B2              | 3q27.1           | 0 | <b>0.0</b> | 0  | <b>0.0</b>  |
| 162 | NL2B017R (D)  | EIF4G1              | 3q27-qter        | 0 | <b>0.0</b> | 0  | <b>0.0</b>  |
| 163 | NL1088R (D)   | CLCN2               | 3q27-q28         | 0 | <b>0.0</b> | 2  | <b>4.2</b>  |
| 164 | NR1-WB21R (C) | EPHB3               | 3q21-qter        | 0 | <b>0.0</b> | 2  | <b>4.2</b>  |
| 165 | NL1Z302R (D)  | MAGEF1              | 3q13             | 0 | <b>0.0</b> | 1  | <b>2.1</b>  |
| 166 | AP19R (S)     | ETV5                | 3q28             | 0 | <b>0.0</b> | 0  | <b>0.0</b>  |
| 167 | NL1-GJ12R (C) | ST6GAL1             | 3q27-28          | 0 | <b>0.0</b> | 3  | <b>6.3</b>  |
| 168 | NR1-AK24R     | BCL6                | 3q27             | 0 | <b>0.0</b> | 7  | <b>14.6</b> |
| 169 | NL1A313R (S)  | LOC339929           | 3q27.3           | 0 | <b>0.0</b> | 0  | <b>0.0</b>  |
| 170 | NL1-YH24R (S) | LEPREL1             | 3q28             | 0 | <b>0.0</b> | 0  | <b>0.0</b>  |
| 171 | NR1-NH1R (C)  | FGF12               | 3q28             | 1 | <b>2.1</b> | 12 | <b>25.0</b> |
| 172 | NL2B060R (D)  | HES1 (LOC100505920) | 3q28-q29         | 0 | <b>0.0</b> | 1  | <b>2.1</b>  |
| 173 | AP34R (D)     | LOC100507391        | 3q29             | 0 | <b>0.0</b> | 0  | <b>0.0</b>  |
| 174 | NR1-AM11R (C) | C3orf21             | 3q29             | 0 | <b>0.0</b> | 4  | <b>8.3</b>  |
| 175 | NLG26R (D)    | TNK2/APOD           | 3q26.2-qter/3q29 | 0 | <b>0.0</b> | 0  | <b>0.0</b>  |
| 176 | NL2Z252R (D)  | TFRC                | 3q29             | 0 | <b>0.0</b> | 0  | <b>0.0</b>  |
| 177 | HSJ-DP22RS    | C3orf43             | 3q29             | 0 | <b>0.0</b> | 1  | <b>2.1</b>  |
| 178 | NLMA216R (S)  | C3orf34/PIGX        | 3q29             | 0 | <b>0.0</b> | 0  | <b>0.0</b>  |
| 179 | NRL094R (D)   | BDH1                | 3q29             | 0 | <b>0.0</b> | 0  | <b>0.0</b>  |
| 180 | NR1-PF24RS    | LRCH3               | 3q29             | 0 | <b>0.0</b> | 0  | <b>0.0</b>  |

| Homo + Hemi<br>Del/Met |      | Amplification/<br>Demet |     | Retention |       | No info |      |
|------------------------|------|-------------------------|-----|-----------|-------|---------|------|
| N                      | %    | N                       | %   | N         | %     | N       | %    |
| 21                     | 43.8 | 0                       | 0.0 | 26        | 54.2  | 1       | 2.1  |
| 13                     | 27.1 | 0                       | 0.0 | 23        | 47.9  | 12      | 25.0 |
| 6                      | 12.5 | 0                       | 0.0 | 25        | 52.1  | 17      | 35.4 |
| 1                      | 2.1  | 0                       | 0.0 | 46        | 95.8  | 1       | 2.1  |
| 3                      | 6.3  | 0                       | 0.0 | 44        | 91.7  | 1       | 2.1  |
| 2                      | 4.2  | 0                       | 0.0 | 44        | 91.7  | 2       | 4.2  |
| 1                      | 2.1  | 0                       | 0.0 | 27        | 56.3  | 20      | 41.7 |
| 17                     | 35.4 | 0                       | 0.0 | 28        | 58.3  | 3       | 6.3  |
| 1                      | 2.1  | 0                       | 0.0 | 33        | 68.8  | 14      | 29.2 |
| 0                      | 0.0  | 0                       | 0.0 | 45        | 93.8  | 3       | 6.3  |
| 1                      | 2.1  | 0                       | 0.0 | 46        | 95.8  | 1       | 2.1  |
| 10                     | 20.8 | 0                       | 0.0 | 27        | 56.3  | 11      | 22.9 |
| 2                      | 4.2  | 0                       | 0.0 | 46        | 95.8  | 0       | 0.0  |
| 15                     | 31.3 | 0                       | 0.0 | 10        | 20.8  | 23      | 47.9 |
| 3                      | 6.3  | 0                       | 0.0 | 44        | 91.7  | 1       | 2.1  |
| 7                      | 14.6 | 0                       | 0.0 | 21        | 43.8  | 20      | 41.7 |
| 1                      | 2.1  | 0                       | 0.0 | 40        | 83.3  | 7       | 14.6 |
| 10                     | 20.8 | 0                       | 0.0 | 36        | 75.0  | 2       | 4.2  |
| 11                     | 22.9 | 0                       | 0.0 | 29        | 60.4  | 8       | 16.7 |
| 2                      | 4.2  | 0                       | 0.0 | 45        | 93.8  | 1       | 2.1  |
| 10                     | 20.8 | 0                       | 0.0 | 20        | 41.7  | 18      | 37.5 |
| 0                      | 0.0  | 0                       | 0.0 | 47        | 97.9  | 1       | 2.1  |
| 0                      | 0.0  | 0                       | 0.0 | 47        | 97.9  | 1       | 2.1  |
| 0                      | 0.0  | 0                       | 0.0 | 47        | 97.9  | 1       | 2.1  |
| 5                      | 10.4 | 0                       | 0.0 | 41        | 85.4  | 2       | 4.2  |
| 12                     | 25.0 | 0                       | 0.0 | 36        | 75.0  | 0       | 0.0  |
| 4                      | 8.3  | 0                       | 0.0 | 44        | 91.7  | 0       | 0.0  |
| 11                     | 22.9 | 0                       | 0.0 | 25        | 52.1  | 12      | 25.0 |
| 18                     | 37.5 | 1                       | 2.1 | 26        | 54.2  | 3       | 6.3  |
| 2                      | 4.2  | 0                       | 0.0 | 26        | 54.2  | 20      | 41.7 |
| 4                      | 8.3  | 0                       | 0.0 | 1         | 2.1   | 43      | 89.6 |
| 11                     | 22.9 | 0                       | 0.0 | 19        | 39.6  | 18      | 37.5 |
| 19                     | 39.6 | 0                       | 0.0 | 8         | 16.7  | 21      | 43.8 |
| 3                      | 6.3  | 0                       | 0.0 | 42        | 87.5  | 3       | 6.3  |
| 3                      | 6.3  | 0                       | 0.0 | 34        | 70.8  | 11      | 22.9 |
| 0                      | 0.0  | 0                       | 0.0 | 48        | 100.0 | 0       | 0.0  |
| 3                      | 6.3  | 0                       | 0.0 | 43        | 89.6  | 2       | 4.2  |
| 6                      | 12.5 | 1                       | 2.1 | 29        | 60.4  | 12      | 25.0 |
| 3                      | 6.3  | 0                       | 0.0 | 44        | 91.7  | 1       | 2.1  |
| 0                      | 0.0  | 0                       | 0.0 | 48        | 100.0 | 0       | 0.0  |
| 20                     | 41.7 | 0                       | 0.0 | 25        | 52.1  | 3       | 6.3  |
| 15                     | 31.2 | 0                       | 0.0 | 16        | 33.3  | 17      | 35.4 |
| 0                      | 0.0  | 0                       | 0.0 | 30        | 62.5  | 18      | 37.5 |
| 0                      | 0.0  | 0                       | 0.0 | 48        | 100.0 | 0       | 0.0  |
| 14                     | 29.2 | 0                       | 0.0 | 18        | 37.5  | 16      | 33.3 |

|    |      |   |     |    |       |    |      |
|----|------|---|-----|----|-------|----|------|
| 6  | 12.5 | 0 | 0.0 | 33 | 68.8  | 9  | 18.8 |
| 0  | 0.0  | 1 | 2.1 | 46 | 95.8  | 1  | 2.1  |
| 3  | 6.3  | 1 | 2.1 | 41 | 85.4  | 3  | 6.3  |
| 4  | 8.3  | 1 | 2.1 | 41 | 85.4  | 2  | 4.2  |
| 5  | 10.4 | 0 | 0.0 | 25 | 52.1  | 18 | 37.5 |
| 1  | 2.1  | 0 | 0.0 | 47 | 97.9  | 0  | 0.0  |
| 12 | 25.0 | 0 | 0.0 | 12 | 25.0  | 24 | 50.0 |
| 2  | 4.2  | 0 | 0.0 | 43 | 89.6  | 3  | 6.3  |
| 2  | 4.2  | 0 | 0.0 | 41 | 85.4  | 5  | 10.4 |
| 2  | 4.2  | 0 | 0.0 | 45 | 93.8  | 1  | 2.1  |
| 7  | 14.6 | 0 | 0.0 | 37 | 77.1  | 4  | 8.3  |
| 7  | 14.6 | 0 | 0.0 | 12 | 25.0  | 29 | 60.4 |
| 0  | 0.0  | 0 | 0.0 | 46 | 95.8  | 2  | 4.2  |
| 2  | 4.2  | 0 | 0.0 | 39 | 81.3  | 7  | 14.6 |
| 0  | 0.0  | 1 | 2.1 | 33 | 68.8  | 14 | 29.2 |
| 0  | 0.0  | 0 | 0.0 | 39 | 81.3  | 9  | 18.8 |
| 2  | 4.2  | 0 | 0.0 | 39 | 81.3  | 7  | 14.6 |
| 0  | 0.0  | 0 | 0.0 | 45 | 93.8  | 3  | 6.3  |
| 2  | 4.2  | 0 | 0.0 | 41 | 85.4  | 5  | 10.4 |
| 0  | 0.0  | 0 | 0.0 | 33 | 68.8  | 15 | 31.3 |
| 0  | 0.0  | 0 | 0.0 | 47 | 97.9  | 1  | 2.1  |
| 7  | 14.6 | 0 | 0.0 | 21 | 43.8  | 20 | 41.7 |
| 1  | 2.1  | 0 | 0.0 | 46 | 95.8  | 1  | 2.1  |
| 0  | 0.0  | 0 | 0.0 | 48 | 100.0 | 0  | 0.0  |
| 1  | 2.1  | 0 | 0.0 | 46 | 95.8  | 1  | 2.1  |
| 1  | 2.1  | 0 | 0.0 | 46 | 95.8  | 1  | 2.1  |
| 1  | 2.1  | 0 | 0.0 | 47 | 97.9  | 0  | 0.0  |
| 0  | 0.0  | 0 | 0.0 | 40 | 83.3  | 8  | 16.7 |
| 0  | 0.0  | 0 | 0.0 | 44 | 91.7  | 4  | 8.3  |
| 0  | 0.0  | 0 | 0.0 | 45 | 93.8  | 3  | 6.3  |
| 2  | 4.2  | 0 | 0.0 | 22 | 45.8  | 24 | 50.0 |
| 0  | 0.0  | 0 | 0.0 | 37 | 77.1  | 11 | 22.9 |
| 1  | 2.1  | 1 | 2.1 | 44 | 91.7  | 2  | 4.2  |
| 0  | 0.0  | 0 | 0.0 | 35 | 72.9  | 13 | 27.1 |
| 2  | 4.2  | 0 | 0.0 | 38 | 79.2  | 8  | 16.7 |
| 0  | 0.0  | 0 | 0.0 | 39 | 81.3  | 9  | 18.8 |
| 0  | 0.0  | 0 | 0.0 | 39 | 81.3  | 9  | 18.8 |
| 1  | 2.1  | 0 | 0.0 | 43 | 89.6  | 4  | 8.3  |
| 0  | 0.0  | 0 | 0.0 | 48 | 100.0 | 0  | 0.0  |
| 21 | 43.8 | 0 | 0.0 | 24 | 50.0  | 3  | 6.3  |
| 3  | 6.3  | 0 | 0.0 | 43 | 89.6  | 2  | 4.2  |
| 3  | 6.3  | 0 | 0.0 | 42 | 87.5  | 3  | 6.3  |
| 8  | 16.7 | 0 | 0.0 | 38 | 79.2  | 2  | 4.2  |
| 0  | 0.0  | 0 | 0.0 | 46 | 95.8  | 2  | 4.2  |
| 5  | 10.4 | 0 | 0.0 | 27 | 56.3  | 16 | 33.3 |
| 14 | 29.2 | 0 | 0.0 | 29 | 60.4  | 5  | 10.4 |
| 16 | 33.3 | 0 | 0.0 | 31 | 64.6  | 1  | 2.1  |
| 0  | 0.0  | 0 | 0.0 | 40 | 83.3  | 8  | 16.7 |
| 2  | 4.2  | 1 | 2.1 | 41 | 85.4  | 4  | 8.3  |
| 5  | 10.4 | 0 | 0.0 | 25 | 52.1  | 18 | 37.5 |
| 13 | 27.1 | 0 | 0.0 | 21 | 43.8  | 14 | 29.2 |
| 7  | 14.6 | 0 | 0.0 | 16 | 33.3  | 25 | 52.1 |

|    |      |   |     |    |       |    |      |
|----|------|---|-----|----|-------|----|------|
| 4  | 8.3  | 0 | 0.0 | 29 | 60.4  | 15 | 31.3 |
| 1  | 2.1  | 1 | 2.1 | 43 | 89.6  | 3  | 6.3  |
| 0  | 0.0  | 0 | 0.0 | 48 | 100.0 | 0  | 0.0  |
| 0  | 0.0  | 0 | 0.0 | 48 | 100.0 | 0  | 0.0  |
| 1  | 2.1  | 0 | 0.0 | 36 | 75.0  | 11 | 22.9 |
| 9  | 18.8 | 0 | 0.0 | 27 | 56.3  | 12 | 25.0 |
| 1  | 2.1  | 0 | 0.0 | 45 | 93.8  | 2  | 4.2  |
| 0  | 0.0  | 1 | 2.1 | 47 | 97.9  | 0  | 0.0  |
| 1  | 2.1  | 0 | 0.0 | 46 | 95.8  | 1  | 2.1  |
| 4  | 8.3  | 1 | 2.1 | 33 | 68.8  | 10 | 20.8 |
| 1  | 2.1  | 0 | 0.0 | 43 | 89.6  | 4  | 8.3  |
| 9  | 18.8 | 0 | 0.0 | 20 | 41.7  | 19 | 39.6 |
| 1  | 2.1  | 0 | 0.0 | 44 | 91.7  | 3  | 6.3  |
| 11 | 22.9 | 0 | 0.0 | 33 | 68.8  | 4  | 8.3  |
| 8  | 16.7 | 0 | 0.0 | 21 | 43.8  | 19 | 39.6 |
| 9  | 18.8 | 0 | 0.0 | 23 | 47.9  | 16 | 33.3 |
| 5  | 10.4 | 0 | 0.0 | 39 | 81.3  | 4  | 8.3  |
| 2  | 4.2  | 0 | 0.0 | 41 | 85.4  | 5  | 10.4 |
| 3  | 6.3  | 0 | 0.0 | 24 | 50.0  | 21 | 43.8 |
| 6  | 12.5 | 0 | 0.0 | 19 | 39.6  | 23 | 47.9 |
| 0  | 0.0  | 0 | 0.0 | 47 | 97.9  | 1  | 2.1  |
| 0  | 0.0  | 0 | 0.0 | 46 | 95.8  | 2  | 4.2  |
| 0  | 0.0  | 0 | 0.0 | 42 | 87.5  | 6  | 12.5 |
| 0  | 0.0  | 0 | 0.0 | 43 | 89.6  | 5  | 10.4 |
| 0  | 0.0  | 0 | 0.0 | 44 | 91.7  | 4  | 8.3  |
| 1  | 2.1  | 0 | 0.0 | 45 | 93.8  | 2  | 4.2  |
| 0  | 0.0  | 2 | 4.2 | 43 | 89.6  | 3  | 6.3  |
| 0  | 0.0  | 0 | 0.0 | 45 | 93.8  | 3  | 6.3  |
| 9  | 18.8 | 1 | 2.1 | 29 | 60.4  | 9  | 18.8 |
| 8  | 16.7 | 0 | 0.0 | 0  | 0.0   | 40 | 83.3 |
| 2  | 4.2  | 0 | 0.0 | 44 | 91.7  | 2  | 4.2  |
| 0  | 0.0  | 0 | 0.0 | 43 | 89.6  | 5  | 10.4 |
| 3  | 6.3  | 1 | 2.1 | 22 | 45.8  | 22 | 45.8 |
| 13 | 27.1 | 0 | 0.0 | 20 | 41.7  | 15 | 31.3 |
| 10 | 20.8 | 0 | 0.0 | 17 | 35.4  | 21 | 43.8 |
| 0  | 0.0  | 0 | 0.0 | 25 | 52.1  | 23 | 47.9 |
| 10 | 20.8 | 0 | 0.0 | 35 | 72.9  | 3  | 6.3  |
| 1  | 2.1  | 0 | 0.0 | 45 | 93.8  | 2  | 4.2  |
| 0  | 0.0  | 0 | 0.0 | 45 | 93.8  | 3  | 6.3  |
| 0  | 0.0  | 0 | 0.0 | 41 | 85.4  | 7  | 14.6 |
| 0  | 0.0  | 0 | 0.0 | 46 | 95.8  | 2  | 4.2  |
| 3  | 6.3  | 0 | 0.0 | 44 | 91.7  | 1  | 2.1  |
| 0  | 0.0  | 0 | 0.0 | 48 | 100.0 | 0  | 0.0  |
| 1  | 2.1  | 0 | 0.0 | 44 | 91.7  | 3  | 6.3  |
| 3  | 6.3  | 0 | 0.0 | 15 | 31.3  | 30 | 62.5 |
| 0  | 0.0  | 0 | 0.0 | 40 | 83.3  | 8  | 16.7 |
| 12 | 25.0 | 1 | 2.1 | 15 | 31.3  | 20 | 41.7 |
| 0  | 0.0  | 0 | 0.0 | 40 | 83.3  | 8  | 16.7 |
| 8  | 16.7 | 0 | 0.0 | 24 | 50.0  | 16 | 33.3 |
| 3  | 6.3  | 3 | 6.3 | 3  | 6.3   | 39 | 81.3 |
| 4  | 8.3  | 0 | 0.0 | 37 | 77.1  | 7  | 14.6 |
| 0  | 0.0  | 0 | 0.0 | 43 | 89.6  | 5  | 10.4 |



|    |      |   |     |    |      |    |      |
|----|------|---|-----|----|------|----|------|
| 3  | 6.3  | 0 | 0.0 | 40 | 83.3 | 5  | 10.4 |
| 0  | 0.0  | 0 | 0.0 | 40 | 83.3 | 8  | 16.7 |
| 1  | 2.1  | 0 | 0.0 | 40 | 83.3 | 7  | 14.6 |
| 1  | 2.1  | 0 | 0.0 | 42 | 87.5 | 5  | 10.4 |
| 6  | 12.5 | 1 | 2.1 | 27 | 56.3 | 14 | 29.2 |
| 0  | 0.0  | 0 | 0.0 | 40 | 83.3 | 8  | 16.7 |
| 0  | 0.0  | 0 | 0.0 | 47 | 97.9 | 1  | 2.1  |
| 0  | 0.0  | 0 | 0.0 | 35 | 72.9 | 13 | 27.1 |
| 2  | 4.2  | 0 | 0.0 | 45 | 93.8 | 1  | 2.1  |
| 2  | 4.2  | 0 | 0.0 | 44 | 91.7 | 2  | 4.2  |
| 0  | 0.0  | 0 | 0.0 | 41 | 85.4 | 7  | 14.6 |
| 0  | 0.0  | 0 | 0.0 | 43 | 89.6 | 5  | 10.4 |
| 0  | 0.0  | 0 | 0.0 | 44 | 91.7 | 4  | 8.3  |
| 2  | 4.2  | 0 | 0.0 | 40 | 83.3 | 6  | 12.5 |
| 2  | 4.2  | 0 | 0.0 | 41 | 85.4 | 5  | 10.4 |
| 1  | 2.1  | 0 | 0.0 | 34 | 70.8 | 13 | 27.1 |
| 0  | 0.0  | 0 | 0.0 | 45 | 93.8 | 3  | 6.3  |
| 3  | 6.3  | 0 | 0.0 | 44 | 91.7 | 1  | 2.1  |
| 7  | 14.6 | 0 | 0.0 | 30 | 62.5 | 11 | 22.9 |
| 0  | 0.0  | 0 | 0.0 | 47 | 97.9 | 1  | 2.1  |
| 0  | 0.0  | 0 | 0.0 | 42 | 87.5 | 6  | 12.5 |
| 13 | 27.1 | 0 | 0.0 | 23 | 47.9 | 12 | 25.0 |
| 1  | 2.1  | 0 | 0.0 | 45 | 93.8 | 2  | 4.2  |
| 0  | 0.0  | 0 | 0.0 | 43 | 89.6 | 5  | 10.4 |
| 4  | 8.3  | 0 | 0.0 | 42 | 87.5 | 2  | 4.2  |
| 0  | 0.0  | 0 | 0.0 | 47 | 97.9 | 1  | 2.1  |
| 0  | 0.0  | 0 | 0.0 | 28 | 58.3 | 20 | 41.7 |
| 1  | 2.1  | 0 | 0.0 | 42 | 87.5 | 5  | 10.4 |
| 0  | 0.0  | 1 | 2.1 | 45 | 93.8 | 2  | 4.2  |
| 0  | 0.0  | 0 | 0.0 | 37 | 77.1 | 11 | 22.9 |
| 0  | 0.0  | 0 | 0.0 | 47 | 97.9 | 1  | 2.1  |

**Table S2.** Main characteristics of thirty TSGs and newly identified TSGs candidates with high deletions/methylation frequency in cervical cancer.

| <b>Gene symbol and location</b>  | <b>Protein Function*</b>                                                                                                                                                                                                                                                                                                                                            | <b>Involvement in cancer</b>                                                                                                                                                                                                                                                                                                                                                                                                                                                                                                 |
|----------------------------------|---------------------------------------------------------------------------------------------------------------------------------------------------------------------------------------------------------------------------------------------------------------------------------------------------------------------------------------------------------------------|------------------------------------------------------------------------------------------------------------------------------------------------------------------------------------------------------------------------------------------------------------------------------------------------------------------------------------------------------------------------------------------------------------------------------------------------------------------------------------------------------------------------------|
| <b><i>LRRN1</i></b><br>3p26.2    | Leucine rich repeat neuronal 1 is required for formation of neuromeric boundaries during neural development. <sup>1, 2</sup> A single-pass transmembrane protein with 12 extracellular leucine-rich repeats most closely related to TRN/CAPS. <sup>1</sup> The mechanism of action of this protein family is currently unknown.                                     | According to our NotI microarray and qPCR data the gene is frequently methylated/deleted and down-regulated in NSCLC, <sup>3</sup> also frequently methylated/deleted in ovarian cancer. <sup>4</sup>                                                                                                                                                                                                                                                                                                                        |
| <b><i>PRICKLE2</i></b><br>3p14.1 | A member of a group of planar cell polarity (PCP) signaling molecules implicated in the regulation of cellular polarity and invasion. <sup>5</sup> Generally expressed in postmitotic neurons and promote neurite outgrowth. <sup>6</sup>                                                                                                                           | Involved in WNT signaling pathway that is subjected to frequent aberrations in cancer. <sup>7</sup> According to our NotI microarray data this gene is frequently methylated/deleted in NSCLC and ovarian cancer. <sup>3,4</sup>                                                                                                                                                                                                                                                                                             |
| <b><i>ITGA9</i></b><br>3p21.3    | Alpha integrin-9, a member of transmembrane glycoprotein receptors responsible for cell-cell and cell-matrix interactions. <sup>8, 9</sup> As heterodimer with beta1 subunit - $\alpha9\beta1$ interacts with VCAM1 (vascular cell adhesion molecule 1), fibronectin, osteopontin, VEGF-C, -D and VEGF-A isoforms).<br><br><b>Tumor suppressor.</b> <sup>3,10</sup> | Chromosomal aberrations in head and neck cancer, <sup>11</sup> methylation in BC <sup>12</sup> and colorectal cancer, <sup>13</sup> deletions in cervical cancer and precancer lesions. <sup>14, 15</sup> Fusion of <i>MLH1</i> and <i>ITGA9</i> in hereditary colorectal carcinoma (Lynch syndrome). <sup>16</sup> Down-regulation in NSCLC, <sup>3</sup> overexpression in SCLC. <sup>17</sup> According to our NotI microarray data the gene is frequently methylated/deleted in NSCLC and ovarian cancer. <sup>3,4</sup> |
| <b><i>LRRC3B</i></b><br>3p24     | Leucine rich repeat containing 3B is an evolutionarily highly conserved membrane protein of unknown function.<br><br><b>Tumor suppressor candidate.</b> <sup>18,19</sup>                                                                                                                                                                                            | Methylation in gastric cancer, <sup>18</sup> in acute leukemia, <sup>20</sup> in colorectal cancer. <sup>21</sup> Down-regulation in colorectal cancer, <sup>21</sup> in gastric cancer. <sup>18</sup> According to our NotI microarray data the gene is frequently methylated/deleted in different cancers. <sup>3,4,19</sup>                                                                                                                                                                                               |
| <b><i>NKIRAS1</i></b><br>3p24.2  | Atypical Ras-like protein that acts as a potent regulator of NF- $\kappa$ B activity                                                                                                                                                                                                                                                                                | A member of NF- $\kappa$ B pathway that is frequently deregulated in cancer. <sup>22, 23</sup>                                                                                                                                                                                                                                                                                                                                                                                                                               |

|                                |                                                                                                                                                                                                                                                                                                                                                          |                                                                                                                                                                                                                                                                                                                                                                                                                                                                                |
|--------------------------------|----------------------------------------------------------------------------------------------------------------------------------------------------------------------------------------------------------------------------------------------------------------------------------------------------------------------------------------------------------|--------------------------------------------------------------------------------------------------------------------------------------------------------------------------------------------------------------------------------------------------------------------------------------------------------------------------------------------------------------------------------------------------------------------------------------------------------------------------------|
|                                | by preventing the degradation of NF- $\kappa$ B inhibitor beta (NFKBIB).                                                                                                                                                                                                                                                                                 | Chromosomal aberrations and down-regulation in kidney cancer. <sup>24</sup> Overexpression, associated with poor prognosis in gliomas. <sup>25</sup> According to our NotI microarray data the gene is frequently methylated/deleted in NSCLC and ovarian cancer. <sup>3,4</sup>                                                                                                                                                                                               |
| <b><i>RPL15</i></b><br>3p24.2  | A ribosomal protein, a component of the large 60S subunit. Belongs to the L15E family of ribosomal proteins.                                                                                                                                                                                                                                             | Overexpression in gastric cancer (both mRNA and protein). <sup>26</sup> Differentially expressed in cutaneous squamous cell carcinoma. <sup>27</sup> According to our NotI microarray data the gene is frequently methylated/deleted in NSCLC and ovarian cancer. <sup>3,4</sup>                                                                                                                                                                                               |
| <b><i>VHL</i></b><br>3p25.3    | Involved in the ubiquitination and subsequent proteasomal degradation via the von Hippel-Lindau ubiquitination complex, involved in transcriptional repression through interaction with HIF1A, HIF1AN and histone deacetylases.<br><br><b>Tumor suppressor.</b> <sup>28</sup>                                                                            | Mutations (both hereditary and somatic) and methylation in kidney cancer. <sup>29-32</sup> Deletion and methylation in pancreatic adenomas. <sup>33</sup> LOH in follicular thyroid cancer. <sup>34</sup> LOH and mutations in hemangioblastomas. <sup>35</sup> mRNA and protein down-regulation in kidney cancer <sup>36, 37</sup> and in lung cancer. <sup>3,38</sup> According to our NotI microarray data the gene is frequently methylated/deleted in NSCLC. <sup>3</sup> |
| <b><i>PDZRN3</i></b><br>3p13   | E3 ubiquitin-protein ligase plays an important role in regulation of the surface level of MUSK (skeletal muscle-specific tyrosine-protein kinase receptor), might contribute to terminal myogenic differentiation, <sup>39</sup> negatively regulates BMP2-induced osteoblast differentiation through inhibition of WNT signaling pathway. <sup>40</sup> | Conventional renal cell carcinoma-associated rearrangement breakpoints were localized in 3p12.3 region between <i>PDZRN3</i> and <i>CNTN3</i> genes. <sup>40</sup> Germ-line <i>PDZRN3</i> deletions were observed in genomes of patients with strong family history of pancreatic cancer. <sup>41</sup>                                                                                                                                                                       |
| <b><i>IQSEC1</i></b><br>3p25.2 | ARF-specific guanine nucleotide exchange factor, a member of a family of small GTPases, mediates internalisation of beta-1 integrin, <sup>42</sup> regulates phagocytosis of monocytic phagocytes. <sup>43</sup>                                                                                                                                         | Abnormality of EGFR-IQSEC1-ARF6-AMAP1 signalling pathway is essential for BC invasion and metastasis. <sup>44,45</sup> According to our NotI microarray and qPCR data the gene is frequently methylated/deleted and down-                                                                                                                                                                                                                                                      |

|                                      |                                                                                                                                                                                                                                                                                                                                                                                                                                  |                                                                                                                                                                                                                                                                                                                                                                                                                                                                            |
|--------------------------------------|----------------------------------------------------------------------------------------------------------------------------------------------------------------------------------------------------------------------------------------------------------------------------------------------------------------------------------------------------------------------------------------------------------------------------------|----------------------------------------------------------------------------------------------------------------------------------------------------------------------------------------------------------------------------------------------------------------------------------------------------------------------------------------------------------------------------------------------------------------------------------------------------------------------------|
|                                      |                                                                                                                                                                                                                                                                                                                                                                                                                                  | regulated in NSCLC, <sup>3</sup> also frequently methylated/deleted in ovarian cancer. <sup>4</sup>                                                                                                                                                                                                                                                                                                                                                                        |
| <b><i>RBPS3/CTDSPL</i></b><br>3p21.3 | Belongs to a family of small CTD phosphatases. Negative regulator of the RNA polymerase II (Pol II), preferentially catalyzes serine-5 dephosphorylation in the specific sequence of the Pol II large subunit and in other proteins. Can activate the tumor suppressor RB1 (retinoblastoma 1), that leads to cell cycle arrest at G <sub>1</sub> /S phases boundary. <sup>46</sup><br><br><b>Tumor suppressor.</b> <sup>46</sup> | Low expression levels in various epithelial tumors because of deletions and methylation, <sup>3, 47-49</sup> these aberrations were found in premalignant lesions of head and neck, <sup>11</sup> and cervix. <sup>14</sup> High mutability of <i>RBSP3</i> was revealed in various primary tumors and cell lines. <sup>46, 50</sup> According to our NotI microarray data the gene is frequently methylated/deleted in NSCLC and ovarian cancer. <sup>3,4</sup>           |
| <b><i>GORASP1</i></b><br>3p22.2      | Golgi membrane protein involved in establishing the stacked structure of the Golgi apparatus; a caspase-3 substrate. Its cleavage contributes to Golgi fragmentation in apoptosis.                                                                                                                                                                                                                                               | According to our NotI microarray data the gene is frequently methylated/deleted in NSCLC and ovarian cancer. <sup>3,4</sup>                                                                                                                                                                                                                                                                                                                                                |
| <b><i>TTC21A</i></b><br>3p22.2       | Putatively involved in stress response.                                                                                                                                                                                                                                                                                                                                                                                          | According to our NotI microarray data the gene is frequently methylated/deleted in NSCLC and ovarian cancer. <sup>3,4</sup>                                                                                                                                                                                                                                                                                                                                                |
| <b><i>FOXPI</i></b><br>3p14.1        | A transcription factor belongs to the family of Forkhead box proteins. It is involved in the negative regulation of tissue- and cell type-specific gene transcription. <sup>51</sup>                                                                                                                                                                                                                                             | Involved in chromosomal translocation in MALT lymphoma <sup>52, 53</sup> and in large B-cell lymphoma. <sup>54</sup> RNA and protein down-regulation and deletions in different tumors. <sup>55-58</sup> Overexpressed in a subset of B-cell lymphoma. <sup>59</sup> According to our NotI microarray and qPCR data the gene is frequently methylated/deleted and down-regulated in NSCLC, <sup>3</sup> also frequently methylated/deleted in ovarian cancer. <sup>4</sup> |
| <b><i>BHLHE40**</i></b><br>3p26      | Basic helix-loop-helix protein is a putative transcription factor widely expressed in various normal tissues. Probably involved in the control of                                                                                                                                                                                                                                                                                | Overexpression in gastric cell lines <sup>60</sup> and hepatocellular carcinomas, <sup>61</sup> involvement in apoptosis regulation in breast cancer MCF7 cell line, <sup>62</sup>                                                                                                                                                                                                                                                                                         |

|                                    |                                                                                                                                                                                                                                                                                                                                    |                                                                                                                                                                                                                                                                                                                                                                                                                                                                                                                                                                                                         |
|------------------------------------|------------------------------------------------------------------------------------------------------------------------------------------------------------------------------------------------------------------------------------------------------------------------------------------------------------------------------------|---------------------------------------------------------------------------------------------------------------------------------------------------------------------------------------------------------------------------------------------------------------------------------------------------------------------------------------------------------------------------------------------------------------------------------------------------------------------------------------------------------------------------------------------------------------------------------------------------------|
|                                    | cell differentiation.                                                                                                                                                                                                                                                                                                              | down-regulation associated with poor prognosis in pancreatic ductal adenocarcinoma. <sup>63</sup><br>According to our NotI microarray data the gene is frequently methylated/deleted in NSCLC. <sup>3</sup>                                                                                                                                                                                                                                                                                                                                                                                             |
| <b><i>CGGBP1</i></b><br>3p12-p11.1 | CGG-triplet repeat binding protein is a transcriptional regulator of some cell cycle regulatory genes (TP53, CDKN1A, GAS1 and ARF). Its expression is important for cell cycle progression through multiple parallel mechanisms. It participates in heat shock and related stress responses.                                       | Decreased mRNA levels in testis cancer and various cancer cell lines. <sup>64, 65</sup> Microsatellite instability in ovarian cancer cell line. <sup>66</sup><br>According to our NotI microarray data the gene is frequently methylated/deleted in NSCLC and ovarian cancer. <sup>3, 4</sup>                                                                                                                                                                                                                                                                                                           |
| <b><i>EPHB1</i></b><br>3q21-q23    | A member of the Eph family of receptor tyrosine kinases that are involved in embryonic nervous and vascular system development.<br><br><b>Tumor suppressor candidate.</b> <sup>10</sup>                                                                                                                                            | Epigenetic inactivation in acute lymphoblastic leukemia. <sup>67</sup> Under-expressed in poorly differentiated colorectal cancers. <sup>68</sup> Down-regulation in gastric carcinoma associated with invasion and metastasis <sup>69</sup> but up-regulation in rhabdomyosarcoma <sup>70</sup> and ovarian cancer. <sup>71</sup><br>According to our NotI microarray data the gene is frequently methylated/deleted in NSCLC and ovarian cancer. <sup>3, 4</sup>                                                                                                                                      |
| <b><i>FGF12</i></b><br>3q28        | A member of the fibroblast growth factor family (FGF). The family members possess broad mitogenic and cell survival activities, and are involved in a variety of biological processes, including embryonic development, cell growth, morphogenesis, tissue repair, tumor growth, and invasion. Involved in MAPK signaling pathway. | Significantly methylated in BC <sup>72</sup> and colorectal cancer. <sup>73</sup> Some polymorphic alleles of this gene are associated with a high risk of development of esophageal squamous cell carcinoma. <sup>74</sup> Deletions in hairy cell leukemia <sup>75</sup> but amplifications in lung cancer. <sup>76</sup> Some experts reasonably consider <i>FGF12</i> as the oncogene as it is a growth factor participating in the MAPK pathway. <sup>76, 77</sup><br>According to our NotI microarray data the gene is frequently methylated/deleted in NSCLC and ovarian cancer. <sup>3, 4</sup> |
| <b><i>PLCL2</i></b><br>3p24.3      | This phospholipase C-like protein may play a role in the regulation of                                                                                                                                                                                                                                                             | According to our NotI microarray data this gene is frequently                                                                                                                                                                                                                                                                                                                                                                                                                                                                                                                                           |

|                                                           |                                                                                                                                                                                                                                         |                                                                                                                                                                                                                                                                                                                                                                                                                                                                                     |
|-----------------------------------------------------------|-----------------------------------------------------------------------------------------------------------------------------------------------------------------------------------------------------------------------------------------|-------------------------------------------------------------------------------------------------------------------------------------------------------------------------------------------------------------------------------------------------------------------------------------------------------------------------------------------------------------------------------------------------------------------------------------------------------------------------------------|
|                                                           | Ins(1,4,5)P3 around the endoplasmic reticulum.                                                                                                                                                                                          | methylated/deleted in NSCLC. <sup>3</sup>                                                                                                                                                                                                                                                                                                                                                                                                                                           |
| <b><i>ABHD5</i></b><br>3p21                               | Lysophosphatidic acid acyltransferase which functions in phosphatidic acid biosynthesis. May regulate the cellular storage of triacylglycerol through activation of the phospholipase PNPLA2. Involved in keratinocyte differentiation. | According to our NotI microarray data the gene is frequently methylated/deleted in NSCLC and ovarian cancer. <sup>3,4</sup>                                                                                                                                                                                                                                                                                                                                                         |
| <b><i>C3orf77</i></b><br><b><i>/TOPAZ1</i></b><br>3p21.31 | Function is unknown. May play an important role in germ cell development. <sup>78</sup>                                                                                                                                                 | According to our NotI microarray data the gene is frequently methylated/deleted in NSCLC and ovarian cancer. <sup>3,4</sup>                                                                                                                                                                                                                                                                                                                                                         |
| <b><i>ZIC4</i></b><br>3q24                                | Member of the ZIC family of C2H2-type zinc finger proteins, was shown to suppress $\beta$ -catenin-mediated transcriptional activation within the Wnt/ $\beta$ -catenin signaling pathway (in <i>Xenopus laevis</i> ). <sup>79</sup>    | Methylated CpG islands in bladder cancer; associated with high extent of progression and invasive character of bladder tumors. <sup>80</sup> Its expression is highly selective for medulloblastomas. <sup>81</sup> Up-regulation in desmoid tumors. <sup>82</sup> Its aberrations are associated with SCLC small-cell lung cancer. <sup>83,84</sup><br>According to our NotI microarray data the gene is frequently methylated/deleted in NSCLC and ovarian cancer. <sup>3,4</sup> |
| <b><i>WNT7A</i></b><br>3p25                               | A member of the WNT family secreted signaling proteins. These proteins are implicated in several developmental processes, including regulation of cell fate and patterning during embryogenesis.                                        | Down-regulation in lung cancer, <sup>85,86</sup> in uterine leiomyoma, <sup>87</sup> over-expression in thyroid cancer, <sup>88</sup> in ovarian cancer, associated with poor prognosis. <sup>89,90</sup> Down-regulation, associated with poor prognosis in head and neck squamous cell carcinoma. <sup>91</sup><br>According to our NotI microarray data the gene is frequently methylated/deleted in NSCLC and ovarian cancer. <sup>3,4</sup>                                    |
| <b><i>UBE2E2</i></b><br>3p24.2                            | Accepts ubiquitin from the E1 complex and catalyzes its covalent attachment to other proteins.                                                                                                                                          | According to our NotI microarray data the gene is frequently methylated/deleted in NSCLC. <sup>3</sup>                                                                                                                                                                                                                                                                                                                                                                              |
| <b><i>THRB</i></b><br>3p24.2                              | Nuclear hormone receptor for triiodothyronine; may regulate cell proliferation, differentiation, and                                                                                                                                    | In mouse models, a truncated THRB gene leads to thyroid cancer. <sup>92</sup> Aberrant methylation in tissue and                                                                                                                                                                                                                                                                                                                                                                    |

|                                                               |                                                                                                                                                                                                                                                                                            |                                                                                                                                                                                                                                                                                                                                                                                                                                                                                                                                                                               |
|---------------------------------------------------------------|--------------------------------------------------------------------------------------------------------------------------------------------------------------------------------------------------------------------------------------------------------------------------------------------|-------------------------------------------------------------------------------------------------------------------------------------------------------------------------------------------------------------------------------------------------------------------------------------------------------------------------------------------------------------------------------------------------------------------------------------------------------------------------------------------------------------------------------------------------------------------------------|
|                                                               | apoptosis. <sup>92</sup><br><b>Tumor suppressor.</b> <sup>93</sup>                                                                                                                                                                                                                         | plasma of BC patients. <sup>94</sup> Low frequency of methylation in prostate cancer, <sup>95</sup> but high frequency of LOH in prostate, <sup>96, 97</sup> esophageal cancer, <sup>98</sup> endocrine tumors of the cervix, <sup>99</sup> head and neck cancer. <sup>100</sup> Mutation of this gene in mice predisposes to the development of mammary tumors. <sup>101</sup> Reduced expression in clear cell renal cell cancer. <sup>93</sup> According to our NotI microarray data the gene is frequently methylated/deleted in NSCLC and ovarian cancer. <sup>3,4</sup> |
| <b><i>ALDH1L1</i></b><br>3q21.3                               | Catalyzes the conversion of 10-formyltetrahydrofolate, NADP, and water to tetrahydrofolate, NADPH, and carbon dioxide. Belongs to the aldehyde dehydrogenase family and is responsible for formate oxidation <i>in vivo</i> .<br><br><b>Tumor suppressor candidate.</b> <sup>102-104</sup> | Down-regulation at the mRNA and protein levels in hepatocellular carcinoma, pilocytic astrocytoma, liver cancer, cancer cell lines (A549, HepG2, 293A, Du-145, PC-3). <sup>102, 105, 106</sup> Epigenetic silencing in lung adenocarcinoma, spleen cancer, liver cancer, hemangioma, hepatocellular carcinoma and cancer cell lines (A549, HepG2, HCT116). <sup>107</sup> Suppresses cell motility in NSCLC cell line A549. <sup>108</sup> According to our NotI microarray and qPCR data the gene is frequently methylated/deleted and down-regulated in NSCLC. <sup>3</sup> |
| <b><i>RPL32</i></b><br>3p25-p24                               | A ribosomal protein, a component of the 60S subunit. It belongs to the L32E family of ribosomal proteins.                                                                                                                                                                                  | According to our NotI microarray data the gene is frequently methylated/deleted in NSCLC. <sup>3</sup>                                                                                                                                                                                                                                                                                                                                                                                                                                                                        |
| <b><i>LOC285375</i></b><br><b><i>/LINC00620</i></b><br>3p25.1 | Predicted hypothetical gene (not included in current genome annotation). Probable product is long non-coding RNA.                                                                                                                                                                          | According to our NotI microarray data the gene is frequently methylated/deleted in NSCLC and ovarian cancer. <sup>3,4</sup>                                                                                                                                                                                                                                                                                                                                                                                                                                                   |
| <b><i>FGD5</i></b><br>3p25.1                                  | May activate CDC42, a member of the Ras-like family of Rho- and Rac proteins, by exchanging bound GDP for free GTP. May play a role in regulating the actin cytoskeleton and cell shape.                                                                                                   | According to our NotI microarray and qPCR data the gene is frequently methylated/deleted and down-regulated in NSCLC. <sup>3</sup>                                                                                                                                                                                                                                                                                                                                                                                                                                            |
| <b><i>PPP2R3A</i></b><br>3q22.1                               | A protein of alpha subfamily of regulatory subunit B of the protein                                                                                                                                                                                                                        | Methylated in childhood acute lymphoblastic leukemia. <sup>109</sup>                                                                                                                                                                                                                                                                                                                                                                                                                                                                                                          |

|                                 |                                                                                                                                                                        |                                                                                                                             |
|---------------------------------|------------------------------------------------------------------------------------------------------------------------------------------------------------------------|-----------------------------------------------------------------------------------------------------------------------------|
|                                 | phosphatase 2, one of the four major Ser/Thr phosphatases is implicated in the negative control of cell growth and division.                                           | According to our NotI microarray data the gene is frequently methylated/deleted in NSCLC and ovarian cancer. <sup>3,4</sup> |
| <b><i>SOX14</i></b><br>3q22-q23 | Member of the SOX (SRY-related HMG-box) family of transcription factors involved in the regulation of embryonic development and in the determination of the cell fate. | Methylated in lymphocytic leukemia. <sup>110</sup>                                                                          |

**Note:** \* – GeneCards data portal, available at: <http://www.genecards.org/>. \*\* – One of the aliases of this gene is similar to official gene name of chromosome 9 gene – DEC1, do not implicate them. Abbreviations: NSCLC – non-small cell lung cancer, SCLC – small cell lung cancer, BC – breast cancer.

### References:

1. Andrae LC, Peukert D, Lumsden A, Gilthorpe JD. Analysis of *Lrrn1* expression and its relationship to neuromeric boundaries during chick neural development. *Neural development* 2007; 2:22.
2. Tossell K, Andrae LC, Cudmore C, Lang E, Muthukrishnan U, Lumsden A, et al. *Lrrn1* is required for formation of the midbrain-hindbrain boundary and organiser through regulation of affinity differences between midbrain and hindbrain cells in chick. *Developmental biology* 2011; 352:341-52.
3. Dmitriev AA, Kashuba VI, Haraldson K, Senchenko VN, Pavlova TV, Kudryavtseva AV, et al. Genetic and epigenetic analysis of non-small cell lung cancer with NotI-microarrays. *Epigenetics : official journal of the DNA Methylation Society* 2012; 7:502-13.
4. Kashuba V, Dmitriev AA, Krasnov GS, Pavlova T, Ignatjev I, Gordiyuk VV, et al. NotI Microarrays: Novel Epigenetic Markers for Early Detection and Prognosis of High Grade Serous Ovarian Cancer. *International journal of molecular sciences* 2012; 13:13352-77.
5. Katoh Y, Katoh M. Comparative integromics on FAT1, FAT2, FAT3 and FAT4. *International journal of molecular medicine* 2006; 18:523-8.
6. Okuda H, Miyata S, Mori Y, Tohyama M. Mouse Prickle1 and Prickle2 are expressed in postmitotic neurons and promote neurite outgrowth. *FEBS letters* 2007; 581:4754-60.
7. Katoh M. Networking of WNT, FGF, Notch, BMP, and Hedgehog signaling pathways during carcinogenesis. *Stem cell reviews* 2007; 3:30-8.
8. Arnaout MA, Goodman SL, Xiong JP. Structure and mechanics of integrin-based cell adhesion. *Current opinion in cell biology* 2007; 19:495-507.
9. Luo BH, Carman CV, Springer TA. Structural basis of integrin regulation and signaling. *Annual review of immunology* 2007; 25:619-47.



10. Bozic I, Antal T, Ohtsuki H, Carter H, Kim D, Chen S, et al. Accumulation of driver and passenger mutations during tumor progression. *Proceedings of the National Academy of Sciences of the United States of America* 2010; 107:18545-50.
11. Ghosh A, Ghosh S, Maiti GP, Sabbir MG, Zabarovsky ER, Roy A, et al. Frequent alterations of the candidate genes hMLH1, ITGA9 and RBSP3 in early dysplastic lesions of head and neck: clinical and prognostic significance. *Cancer science* 2010; 101:1511-20.
12. Mostovich LA, Prudnikova TY, Kondratov AG, Loginova D, Vavilov PV, Rykova VI, et al. Integrin alpha9 (ITGA9) expression and epigenetic silencing in human breast tumors. *Cell adhesion & migration* 2011; 5:395-401.
13. Gerashchenko GV, Gordiyuk VV, Skrypkinia IY, Kvasha SM, Kolesnik OO, Ugryn DD, et al. Screening of epigenetic and genetic disturbances of human chromosome 3 genes in colorectal cancer. *Ukrainskii biokhimicheskii zhurnal* 2009; 81:81-7.
14. Mitra S, Mazumder Indra D, Bhattacharya N, Singh RK, Basu PS, Mondal RK, et al. RBSP3 is frequently altered in premalignant cervical lesions: clinical and prognostic significance. *Genes, chromosomes & cancer* 2010; 49:155-70.
15. Senchenko V, Liu J, Braga E, Mazurenko N, Loginov W, Seryogin Y, et al. Deletion mapping using quantitative real-time PCR identifies two distinct 3p21.3 regions affected in most cervical carcinomas. *Oncogene* 2003; 22:2984-92.
16. Meyer C, Brieger A, Plotz G, Weber N, Passmann S, Dingermann T, et al. An interstitial deletion at 3p21.3 results in the genetic fusion of MLH1 and ITGA9 in a Lynch syndrome family. *Clinical cancer research : an official journal of the American Association for Cancer Research* 2009; 15:762-9.
17. Hibi K, Yamakawa K, Ueda R, Horio Y, Murata Y, Tamari M, et al. Aberrant upregulation of a novel integrin alpha subunit gene at 3p21.3 in small cell lung cancer. *Oncogene* 1994; 9:611-9.
18. Kim M, Kim JH, Jang HR, Kim HM, Lee CW, Noh SM, et al. LRRC3B, encoding a leucine-rich repeat-containing protein, is a putative tumor suppressor gene in gastric cancer. *Cancer research* 2008; 68:7147-55.
19. Haraldson K, Kashuba VI, Dmitriev AA, Senchenko VN, Kudryavtseva AV, Pavlova TV, et al. LRRC3B gene is frequently epigenetically inactivated in several epithelial malignancies and inhibits cell growth and replication. *Biochimie* 2012; 94:1151-7.
20. Dou LP, Wang C, Xu ZM, Kang HY, Fan H, Lou FD, et al. Methylation pattern of LRP15 gene in leukemia. *Chinese medical sciences journal = Chung-kuo i hsueh k'o hsueh tsa chih / Chinese Academy of Medical Sciences* 2007; 22:187-91.
21. Tian XQ, Zhang Y, Sun D, Zhao S, Xiong H, Fang J. Epigenetic silencing of LRRC3B in colorectal cancer. *Scandinavian journal of gastroenterology* 2009; 44:79-84.
22. Dolcet X, Llobet D, Pallares J, Matias-Guiu X. NF-kB in development and progression of human cancer. *Virchows Archiv : an international journal of pathology* 2005; 446:475-82.

23. Melisi D, Chiao PJ. NF-kappa B as a target for cancer therapy. *Expert opinion on therapeutic targets* 2007; 11:133-44.
24. Gerashchenko GV, Bogatyrova OO, Rudenko EE, Kondratov AG, Gordiyuk VV, Zgonnyk YM, et al. Genetic and epigenetic changes of NKIRAS1 gene in human renal cell carcinomas. *Experimental oncology* 2010; 32:71-5.
25. Lin H, Wang Y, Zhang X, Liu B, Zhang W, Cheng J. Prognostic significance of kappaB-Ras1 expression in gliomas. *Med Oncol* 2012; 29:1272-9.
26. Wang H, Zhao LN, Li KZ, Ling R, Li XJ, Wang L. Overexpression of ribosomal protein L15 is associated with cell proliferation in gastric cancer. *BMC cancer* 2006; 6:91.
27. Dang C, Gottschling M, Manning K, O'Curraín E, Schneider S, Sterry W, et al. Identification of dysregulated genes in cutaneous squamous cell carcinoma. *Oncology reports* 2006; 16:513-9.
28. Hsu T. Complex cellular functions of the von Hippel-Lindau tumor suppressor gene: insights from model organisms. *Oncogene* 2012; 31:2247-57.
29. Gnarr JR, Tory K, Weng Y, Schmidt L, Wei MH, Li H, et al. Mutations of the VHL tumour suppressor gene in renal carcinoma. *Nature genetics* 1994; 7:85-90.
30. Herman JG, Latif F, Weng Y, Lerman MI, Zbar B, Liu S, et al. Silencing of the VHL tumor-suppressor gene by DNA methylation in renal carcinoma. *Proceedings of the National Academy of Sciences of the United States of America* 1994; 91:9700-4.
31. Kenck C, Wilhelm M, Bugert P, Staehler G, Kovacs G. Mutation of the VHL gene is associated exclusively with the development of non-papillary renal cell carcinomas. *The Journal of pathology* 1996; 179:157-61.
32. Gimenez-Bachs JM, Salinas-Sanchez AS, Sanchez-Sanchez F, Lorenzo-Romero JG, Donate-Moreno MJ, Pastor-Navarro H, et al. VHL protein alterations in sporadic renal cell carcinoma. *Clin Oncol (R Coll Radiol)* 2007; 19:784-9.
33. Vortmeyer AO, Lubensky IA, Fogt F, Linehan WM, Khettry U, Zhuang Z. Allelic deletion and mutation of the von Hippel-Lindau (VHL) tumor suppressor gene in pancreatic microcystic adenomas. *The American journal of pathology* 1997; 151:951-6.
34. Hunt JL, Yim JH, Tometsko M, Finkelstein SD, Swalsky P, Carty SE. Loss of heterozygosity of the VHL gene identifies malignancy and predicts death in follicular thyroid tumors. *Surgery* 2003; 134:1043-7; discussion 7-8.
35. Lee JY, Dong SM, Park WS, Yoo NJ, Kim CS, Jang JJ, et al. Loss of heterozygosity and somatic mutations of the VHL tumor suppressor gene in sporadic cerebellar hemangioblastomas. *Cancer research* 1998; 58:504-8.
36. Clifford SC, Prowse AH, Affara NA, Buys CH, Maher ER. Inactivation of the von Hippel-Lindau (VHL) tumour suppressor gene and allelic losses at chromosome arm 3p in primary renal cell carcinoma: evidence for a VHL-independent pathway in clear cell renal tumourigenesis. *Genes, chromosomes & cancer* 1998; 22:200-9.

37. Tsutsumi H, Miyamoto C, Furuichi Y, Yoshiike M, Nozawa S, Iwamoto T. VHL tumor suppressor gene: its mutation and protein level in renal cell carcinoma. *Oncology reports* 2003; 10:1357-61.
38. Zhao Y, Li Y, Wang S, Lu H, Chen J, Zhang Z, et al. The relationship between EGFR gain and VHL loss in lung adenocarcinoma and poor patient survival. *International journal of clinical oncology / Japan Society of Clinical Oncology* 2011; 16:679-85.
39. Ko JA, Kimura Y, Matsuura K, Yamamoto H, Gondo T, Inui M. PDZRN3 (LNX3, SEMCAP3) is required for the differentiation of C2C12 myoblasts into myotubes. *Journal of cell science* 2006; 119:5106-13.
40. Honda T, Yamamoto H, Ishii A, Inui M. PDZRN3 negatively regulates BMP-2-induced osteoblast differentiation through inhibition of Wnt signaling. *Molecular biology of the cell* 2010; 21:3269-77.
41. Lucito R, Suresh S, Walter K, Pandey A, Lakshmi B, Krasnitz A, et al. Copy-number variants in patients with a strong family history of pancreatic cancer. *Cancer biology & therapy* 2007; 6:1592-9.
42. Shoubridge C, Walikonis RS, Gecz J, Harvey RJ. Subtle functional defects in the Arf-specific guanine nucleotide exchange factor IQSEC2 cause non-syndromic X-linked intellectual disability. *Small GTPases* 2010; 1:98-103.
43. Someya A, Moss J, Nagaoka I. The guanine nucleotide exchange protein for ADP-ribosylation factor 6, ARF-GEP100/BRAG2, regulates phagocytosis of monocytic phagocytes in an ARF6-dependent process. *The Journal of biological chemistry* 2010; 285:30698-707.
44. Morishige M, Hashimoto S, Ogawa E, Toda Y, Kotani H, Hirose M, et al. GEP100 links epidermal growth factor receptor signalling to Arf6 activation to induce breast cancer invasion. *Nature cell biology* 2008; 10:85-92.
45. Sabe H, Hashimoto S, Morishige M, Ogawa E, Hashimoto A, Nam JM, et al. The EGFR-GEP100-Arf6-AMAP1 signaling pathway specific to breast cancer invasion and metastasis. *Traffic* 2009; 10:982-93.
46. Kashuba VI, Li J, Wang F, Senchenko VN, Protopopov A, Malyukova A, et al. RBSP3 (HYA22) is a tumor suppressor gene implicated in major epithelial malignancies. *Proceedings of the National Academy of Sciences of the United States of America* 2004; 101:4906-11.
47. Senchenko VN, Anedchenko EA, Kondratieva TT, Krasnov GS, Dmitriev AA, Zabarovska VI, et al. Simultaneous down-regulation of tumor suppressor genes RBSP3/CTDSPL, NPRL2/G21 and RASSF1A in primary non-small cell lung cancer. *BMC cancer* 2010; 10:75.
48. Sinha S, Singh RK, Alam N, Roy A, Roychoudhury S, Panda CK. Frequent alterations of hMLH1 and RBSP3/HYA22 at chromosomal 3p22.3 region in early and late-onset breast carcinoma: clinical and prognostic significance. *Cancer science* 2008; 99:1984-91.
49. Anedchenko EA, Kiseleva NP, Dmitriev AA, Kiselev FL, Zabarovskii ER, Senchenko VN. [Tumor suppressor gene RBSP3 in cervical carcinoma: copy number and transcriptional level]. *Mol biol (Mosk)* 2007; 41:86-95.

50. Kashuba VI, Pavlova TV, Grigorieva EV, Kutsenko A, Yenamandra SP, Li J, et al. High mutability of the tumor suppressor genes RASSF1 and RBSP3 (CTDSPL) in cancer. *PloS one* 2009; 4:e5231.
51. Chen Z, Xiao Y, Zhang J, Li J, Liu Y, Zhao Y, et al. Transcription factors E2A, FOXO1 and FOXP1 regulate recombination activating gene expression in cancer cells. *PloS one* 2011; 6:e20475.
52. Streubel B, Vinatzer U, Lamprecht A, Raderer M, Chott A. T(3;14)(p14.1;q32) involving IGH and FOXP1 is a novel recurrent chromosomal aberration in MALT lymphoma. *Leukemia : official journal of the Leukemia Society of America, Leukemia Research Fund, UK* 2005; 19:652-8.
53. Goatly A, Bacon CM, Nakamura S, Ye H, Kim I, Brown PJ, et al. FOXP1 abnormalities in lymphoma: translocation breakpoint mapping reveals insights into deregulated transcriptional control. *Modern pathology : an official journal of the United States and Canadian Academy of Pathology, Inc* 2008; 21:902-11.
54. Fenton JA, Schuurin E, Barrans SL, Banham AH, Rollinson SJ, Morgan GJ, et al. t(3;14)(p14;q32) results in aberrant expression of FOXP1 in a case of diffuse large B-cell lymphoma. *Genes, chromosomes & cancer* 2006; 45:164-8.
55. Banham AH, Beasley N, Campo E, Fernandez PL, Fidler C, Gatter K, et al. The FOXP1 winged helix transcription factor is a novel candidate tumor suppressor gene on chromosome 3p. *Cancer research* 2001; 61:8820-9.
56. Toma MI, Grosser M, Herr A, Aust DE, Meye A, Hoefling C, et al. Loss of heterozygosity and copy number abnormality in clear cell renal cell carcinoma discovered by high-density affymetrix 10K single nucleotide polymorphism mapping array. *Neoplasia* 2008; 10:634-42.
57. Giatromanolaki A, Koukourakis MI, Sivridis E, Gatter KC, Harris AL, Banham AH. Loss of expression and nuclear/cytoplasmic localization of the FOXP1 forkhead transcription factor are common events in early endometrial cancer: relationship with estrogen receptors and HIF-1alpha expression. *Modern pathology : an official journal of the United States and Canadian Academy of Pathology, Inc* 2006; 19:9-16.
58. Kim YS, Hwan JD, Bae S, Bae DH, Shick WA. Identification of differentially expressed genes using an annealing control primer system in stage III serous ovarian carcinoma. *BMC cancer* 2010; 10:576.
59. Wlodarska I, Veyt E, De Paepe P, Vandenberghe P, Nooijen P, Theate I, et al. FOXP1, a gene highly expressed in a subset of diffuse large B-cell lymphoma, is recurrently targeted by genomic aberrations. *Leukemia : official journal of the Leukemia Society of America, Leukemia Research Fund, UK* 2005; 19:1299-305.
60. Zheng Y, Shi X, Wang M, Jia Y, Li B, Zhang Y, et al. The increased expression of DEC1 gene is related to HIF-1alpha protein in gastric cancer cell lines. *Molecular biology reports* 2012; 39:4229-36.

61. Shi XH, Zheng Y, Sun Q, Cui J, Liu QH, Qu F, et al. DEC1 nuclear expression: a marker of differentiation grade in hepatocellular carcinoma. *World journal of gastroenterology : WJG* 2011; 17:2037-43.
62. Wu Y, Sato F, Bhawal UK, Kawamoto T, Fujimoto K, Noshiro M, et al. Basic helix-loop-helix transcription factors DEC1 and DEC2 regulate the paclitaxel-induced apoptotic pathway of MCF-7 human breast cancer cells. *International journal of molecular medicine* 2011; 27:491-5.
63. Wang W, Reiser-Erkan C, Michalski CW, Raggi MC, Quan L, Yupei Z, et al. Hypoxia inducible BHLHB2 is a novel and independent prognostic marker in pancreatic ductal adenocarcinoma. *Biochemical and biophysical research communications* 2010; 401:422-8.
64. Lind GE, Skotheim RI, Fraga MF, Abeler VM, Esteller M, Lothe RA. Novel epigenetically deregulated genes in testicular cancer include homeobox genes and SCGB3A1 (HIN-1). *The Journal of pathology* 2006; 210:441-9.
65. Singh U, Roswall P, Uhrbom L, Westermarck B. CGGBP1 regulates cell cycle in cancer cells. *BMC molecular biology* 2011; 12:28.
66. Cody NA, Shen Z, Ripeau JS, Provencher DM, Mes-Masson AM, Chevrette M, et al. Characterization of the 3p12.3-pcen region associated with tumor suppression in a novel ovarian cancer cell line model genetically modified by chromosome 3 fragment transfer. *Molecular carcinogenesis* 2009; 48:1077-92.
67. Kuang SQ, Bai H, Fang ZH, Lopez G, Yang H, Tong W, et al. Aberrant DNA methylation and epigenetic inactivation of Eph receptor tyrosine kinases and ephrin ligands in acute lymphoblastic leukemia. *Blood* 2010; 115:2412-9.
68. Sheng Z, Wang J, Dong Y, Ma H, Zhou H, Sugimura H, et al. EphB1 is underexpressed in poorly differentiated colorectal cancers. *Pathobiology : journal of immunopathology, molecular and cellular biology* 2008; 75:274-80.
69. Wang JD, Dong YC, Sheng Z, Ma HH, Li GL, Wang XL, et al. Loss of expression of EphB1 protein in gastric carcinoma associated with invasion and metastasis. *Oncology* 2007; 73:238-45.
70. Berardi AC, Marsilio S, Rofani C, Salvucci O, Altavista P, Perla FM, et al. Up-regulation of EphB and ephrin-B expression in rhabdomyosarcoma. *Anticancer research* 2008; 28:763-9.
71. Pejovic T, Pande NT, Mori M, Mhaweche-Fauceglia P, Harrington C, Mongoue-Tchokote S, et al. Expression profiling of the ovarian surface kinome reveals candidate genes for early neoplastic changes. *Translational oncology* 2009; 2:341-9.
72. Lian ZQ, Wang Q, Li WP, Zhang AQ, Wu L. Screening of significantly hypermethylated genes in breast cancer using microarray-based methylated-CpG island recovery assay and identification of their expression levels. *International journal of oncology* 2012; 41:629-38.
73. Li H, Du Y, Zhang D, Wang LN, Yang C, Liu B, et al. Identification of novel DNA methylation markers in colorectal cancer using MIRA-based microarrays. *Oncology reports* 2012; 28:99-104.

74. Chattopadhyay I, Singh A, Phukan R, Purkayastha J, Kataki A, Mahanta J, et al. Genome-wide analysis of chromosomal alterations in patients with esophageal squamous cell carcinoma exposed to tobacco and betel quid from high-risk area in India. *Mutation research* 2010; 696:130-8.
75. Forconi F, Poretti G, Kwee I, Sozzi E, Rossi D, Rancoita PM, et al. High density genome-wide DNA profiling reveals a remarkably stable profile in hairy cell leukaemia. *British journal of haematology* 2008; 141:622-30.
76. Kang JU, Koo SH, Kwon KC, Park JW, Kim JM. Identification of novel candidate target genes, including EPHB3, MASP1 and SST at 3q26.2-q29 in squamous cell carcinoma of the lung. *BMC cancer* 2009; 9:237.
77. Jeong H, Kim YR, Kim KN, Choe JG, Chung JK, Kim MK. Effect of all-trans retinoic acid on sodium/iodide symporter expression, radioiodine uptake and gene expression profiles in a human anaplastic thyroid carcinoma cell line. *Nuclear medicine and biology* 2006; 33:875-82.
78. Baillet A, Le Bouffant R, Volff JN, Luangpraseuth A, Poumerol E, Thepot D, et al. TOPAZ1, a novel germ cell-specific expressed gene conserved during evolution across vertebrates. *PloS one* 2011; 6:e26950.
79. Fujimi TJ, Hatayama M, Aruga J. *Xenopus Zic3* controls notochord and organizer development through suppression of the Wnt/beta-catenin signaling pathway. *Developmental biology* 2012; 361:220-31.
80. Kandimalla R, van Tilborg AA, Kompier LC, Stumpel DJ, Stam RW, Bangma CH, et al. Genome-wide analysis of CpG island methylation in bladder cancer identified TBX2, TBX3, GATA2, and ZIC4 as pTa-specific prognostic markers. *European urology* 2012; 61:1245-56.
81. Aruga J, Nozaki Y, Hatayama M, Odaka YS, Yokota N. Expression of ZIC family genes in meningiomas and other brain tumors. *BMC cancer* 2010; 10:79.
82. Pourebrahim R, Van Dam K, Bauters M, De Wever I, Sciort R, Cassiman JJ, et al. ZIC1 gene expression is controlled by DNA and histone methylation in mesenchymal proliferations. *FEBS letters* 2007; 581:5122-6.
83. Bataller L, Wade DF, Graus F, Stacey HD, Rosenfeld MR, Dalmau J. Antibodies to *Zic4* in paraneoplastic neurologic disorders and small-cell lung cancer. *Neurology* 2004; 62:778-82.
84. Sabater L, Bataller L, Suarez-Calvet M, Saiz A, Dalmau J, Graus F. ZIC antibodies in paraneoplastic cerebellar degeneration and small cell lung cancer. *Journal of neuroimmunology* 2008; 201-202:163-5.
85. Calvo R, West J, Franklin W, Erickson P, Bemis L, Li E, et al. Altered HOX and WNT7A expression in human lung cancer. *Proceedings of the National Academy of Sciences of the United States of America* 2000; 97:12776-81.
86. Winn RA, Marek L, Han SY, Rodriguez K, Rodriguez N, Hammond M, et al. Restoration of Wnt-7a expression reverses non-small cell lung cancer cellular transformation through frizzled-9-mediated growth inhibition and promotion of cell differentiation. *The Journal of biological chemistry* 2005; 280:19625-34.

87. Li S, Chiang TC, Davis GR, Williams RM, Wilson VP, McLachlan JA. Decreased expression of Wnt7a mRNA is inversely associated with the expression of estrogen receptor-alpha in human uterine leiomyoma. *The Journal of clinical endocrinology and metabolism* 2001; 86:454-7.
88. Fluge O, Bruland O, Akslen LA, Lillehaug JR, Varhaug JE. Gene expression in poorly differentiated papillary thyroid carcinomas. *Thyroid : official journal of the American Thyroid Association* 2006; 16:161-75.
89. Merritt MA, Parsons PG, Newton TR, Martyn AC, Webb PM, Green AC, et al. Expression profiling identifies genes involved in neoplastic transformation of serous ovarian cancer. *BMC cancer* 2009; 9:378.
90. Zhang XL, Peng CJ, Peng J, Jiang LY, Ning XM, Zheng JH. Prognostic role of Wnt7a expression in ovarian carcinoma patients. *Neoplasma* 2010; 57:545-51.
91. Diaz Prado SM, Medina Villaamil V, Aparicio Gallego G, Blanco Calvo M, Lopez Cedrun JL, Sironvalle Soliva S, et al. Expression of Wnt gene family and frizzled receptors in head and neck squamous cell carcinomas. *Virchows Archiv : an international journal of pathology* 2009; 455:67-75.
92. Jazdzewski K, Boguslawska J, Jendrzewski J, Liyanarachchi S, Pachucki J, Wardyn KA, et al. Thyroid hormone receptor beta (THRB) is a major target gene for microRNAs deregulated in papillary thyroid carcinoma (PTC). *The Journal of clinical endocrinology and metabolism* 2011; 96:E546-53.
93. Master A, Wojcicka A, Piekuelko-Witkowska A, Boguslawska J, Poplawski P, Tanski Z, et al. Untranslated regions of thyroid hormone receptor beta 1 mRNA are impaired in human clear cell renal cell carcinoma. *Biochimica et biophysica acta* 2010; 1802:995-1005.
94. Ling Y, Xu X, Hao J, Ling X, Du X, Liu X, et al. Aberrant methylation of the THRB gene in tissue and plasma of breast cancer patients. *Cancer genetics and cytogenetics* 2010; 196:140-5.
95. Vasiljevic N, Wu K, Brentnall AR, Kim DC, Thorat MA, Kudahetti SC, et al. Absolute quantitation of DNA methylation of 28 candidate genes in prostate cancer using pyrosequencing. *Disease markers* 2011; 30:151-61.
96. Muller I, Urban K, Pantel K, Schwarzenbach H. Comparison of genetic alterations detected in circulating microsatellite DNA in blood plasma samples of patients with prostate cancer and benign prostatic hyperplasia. *Annals of the New York Academy of Sciences* 2006; 1075:222-9.
97. Schwarzenbach H, Chun FK, Muller I, Seidel C, Urban K, Erbersdobler A, et al. Microsatellite analysis of allelic imbalance in tumour and blood from patients with prostate cancer. *BJU international* 2008; 102:253-8.
98. Qiu H, Lotan R, Lippman SM, Xu XC. Lack of correlation between expression of retinoic acid receptor-beta and loss of heterozygosity on chromosome band 3p24 in esophageal cancer. *Genes, chromosomes & cancer* 2000; 28:196-202.

99. Mannion C, Park WS, Man YG, Zhuang Z, Albores-Saavedra J, Tavassoli FA. Endocrine tumors of the cervix: morphologic assessment, expression of human papillomavirus, and evaluation for loss of heterozygosity on 1p,3p, 11q, and 17p. *Cancer* 1998; 83:1391-400.
100. Rowley H, Jones A, Spandidos D, Field J. Definition of a tumor suppressor gene locus on the short arm of chromosome 3 in squamous cell carcinoma of the head and neck by means of microsatellite markers. *Archives of otolaryngology--head & neck surgery* 1996; 122:497-501.
101. Guigon CJ, Kim DW, Willingham MC, Cheng SY. Mutation of thyroid hormone receptor-beta in mice predisposes to the development of mammary tumors. *Oncogene* 2011; 30:3381-90.
102. Krupenko SA, Oleinik NV. 10-formyltetrahydrofolate dehydrogenase, one of the major folate enzymes, is down-regulated in tumor tissues and possesses suppressor effects on cancer cells. *Cell growth & differentiation : the molecular biology journal of the American Association for Cancer Research* 2002; 13:227-36.
103. Oleinik NV, Krupenko SA. Ectopic expression of 10-formyltetrahydrofolate dehydrogenase in A549 cells induces G1 cell cycle arrest and apoptosis. *Molecular cancer research : MCR* 2003; 1:577-88.
104. Ghose S, Oleinik NV, Krupenko NI, Krupenko SA. 10-formyltetrahydrofolate dehydrogenase-induced c-Jun-NH2-kinase pathways diverge at the c-Jun-NH2-kinase substrate level in cells with different p53 status. *Molecular cancer research : MCR* 2009; 7:99-107.
105. Rodriguez FJ, Giannini C, Asmann YW, Sharma MK, Perry A, Tibbetts KM, et al. Gene expression profiling of NF-1-associated and sporadic pilocytic astrocytoma identifies aldehyde dehydrogenase 1 family member L1 (ALDH1L1) as an underexpressed candidate biomarker in aggressive subtypes. *Journal of neuropathology and experimental neurology* 2008; 67:1194-204.
106. Chen XQ, He JR, Wang HY. Decreased expression of ALDH1L1 is associated with a poor prognosis in hepatocellular carcinoma. *Med Oncol* 2012; 29:1843-9.
107. Oleinik NV, Krupenko NI, Krupenko SA. Epigenetic Silencing of ALDH1L1, a Metabolic Regulator of Cellular Proliferation, in Cancers. *Genes & cancer* 2011; 2:130-9.
108. Oleinik NV, Krupenko NI, Krupenko SA. ALDH1L1 inhibits cell motility via dephosphorylation of cofilin by PP1 and PP2A. *Oncogene* 2010; 29:6233-44.
109. Dunwell TL, Hesson LB, Pavlova T, Zabarovska V, Kashuba V, Catchpole D, et al. Epigenetic analysis of childhood acute lymphoblastic leukemia. *Epigenetics : official journal of the DNA Methylation Society* 2009; 4:185-93.
110. Tong WG, Wierda WG, Lin E, Kuang SQ, Bekele BN, Estrov Z, et al. Genome-wide DNA methylation profiling of chronic lymphocytic leukemia allows identification of epigenetically repressed molecular pathways with clinical impact. *Epigenetics : official journal of the DNA Methylation Society* 2010; 5:499-508.



**Tables S3-S5. Results of bisulfite genomic sequencing of genes in cervical SCC from NotI-microarray. A.** Sequence of a gene. CpG sites are shown in bold and yellow, NotI sites are underlined, primers for bisulfite sequencing are shown in red.

**B.** Numbers of SCC presented as Figure 2B. Methylated (red “+”) and unmethylated (black “-”) CG sites are shown in sequenced clones (C1 and etc). CpGs in NotI site are shown in red.

### S3. *ITGA9*

**A.**

**CCCTGGGGTCCCAGCCCAGAGCG**TGGGGGGAGAGC**CG**CTAGAGTTGTCTCCTC**CGCCG**  
 CCCAGCTAGACT**CG**GCTTCACTCTCTGAAT**CG**AAAAGTAACTTGGCTCCTCTGCCTC**CG**  
 GG**CGGCCG****CG**CTGGCCCAG**CG**AGCCTCCTGAACCT**CG**CAGGGCCTGGAGGAGT**CGG**  
 GGC**ACTGGAGCTGCACCCCTCCC****CG**GTTTTGGGGAACCC**CTGAGGAAGGAGTATAGCC**  
**TCTC**

### B. Cervical tumor №17

| CpG | C1 | C2 | C3 | C4 | C5 | C6 | C7 | C8 | C9 | C10 | C11 | C12 | C13 | C14 | C15 | C16 |
|-----|----|----|----|----|----|----|----|----|----|-----|-----|-----|-----|-----|-----|-----|
| 1   | +  | +  | +  | -  | -  | +  | +  | +  | +  | +   | +   | +   | -   | -   | +   | +   |
| 2   | +  | +  | +  | -  | -  | +  | +  | +  | +  | +   | -   | +   | -   | -   | +   | +   |
| 3   | +  | +  | +  | -  | -  | +  | +  | +  | +  | +   | +   | +   | -   | +   | +   | +   |
| 4   | -  | +  | -  | -  | -  | +  | +  | +  | +  | +   | +   | +   | -   | -   | +   | +   |
| 5   | +  | +  | +  | -  | -  | -  | -  | +  | +  | +   | -   | +   | -   | +   | -   | +   |
| 6   | +  | +  | +  | -  | -  | +  | +  | -  | +  | +   | +   | -   | -   | +   | -   | +   |
| 7   | +  | -  | +  | -  | -  | -  | -  | +  | +  | -   | -   | +   | -   | +   | -   | -   |
| 8   | +  | +  | +  | -  | -  | +  | +  | -  | +  | +   | -   | +   | -   | +   | +   | -   |
| 9   | +  | +  | -  | -  | -  | +  | +  | +  | +  | +   | +   | +   | -   | +   | +   | +   |
| 10  | +  | +  | -  | -  | -  | +  | +  | +  | +  | +   | -   | +   | -   | -   | +   | +   |
| 11  | +  | +  | -  | -  | -  | +  | +  | +  | +  | +   | -   | +   | -   | +   | +   | +   |
| 12  | +  | -  | +  | -  | -  | +  | +  | -  | +  | +   | +   | +   | -   | +   | -   | -   |
| 13  | +  | +  | +  | -  | -  | +  | +  | -  | +  | +   | +   | +   | -   | +   | -   | -   |
| 14  | +  | +  | +  | -  | -  | +  | +  | +  | +  | +   | -   | +   | -   | -   | -   | +   |

### S4. *FGF12*

**A.**

**TGTA**AAAAGAGGAAT**CCTGGTTCCTTC**CAC**CG**GGGGTCC**CG**AGGTGCTTTGAGGAGGGA  
 GAAAGGAGGG**CG**TCCCCTCTGGGGAGCCACTCTC**CG**GGCTTCTACTGACCTGGTCTC  
**CG**CCTCAC**CG**GCCTCTTG**CG**GC**CG**CTGCAGAAG**CG**CACTTTGCTGAACACCC**CG**AGGA  
**CG**TGCCTCT**CG**CACAGGGAG**CG**CC**CG**TCTTTGCTGGGGCTGGAG**CGG****CG**CTTGGAGGC  
**CG**ACACT**CG**GT**CG**CTGTTGGACTCCCT**CG**CCTGC**CG**CTTCTGC**CG**GATCAAGGAGCTG  
 GCTAT**CG****CG**CAGCCATAGCTGCTCAG**CG**AGGGCCTCAGGCCCCAGCCTCTACTG**CG**C  
 CCTC**CG**GCTTG**CG**CTC**CG****CG**GGG**CG**AGGGCAGGACCTGGG**CG**GCCAGGGAAAGGGC  
 AGT**CGCG**GGGAG**GCAGTGCTAAAATTGAGGAGGCTGCAG**

**B. Cervical tumor №42**

| CpG | C1 | C2 | C3 | C4 | C5 | C6 | C7 |
|-----|----|----|----|----|----|----|----|
| 1   | +  | -  | -  | -  | +  | -  | -  |
| 2   | +  | -  | -  | -  | +  | -  | -  |
| 3   | +  | +  | -  | +  | +  | -  | -  |
| 4   | +  | +  | +  | +  | +  | -  | -  |
| 5   | +  | +  | +  | +  | +  | -  | -  |
| 6   | +  | +  | +  | +  | +  | -  | -  |
| 7   | +  | +  | +  | +  | +  | -  | -  |
| 8   | +  | +  | +  | +  | +  | -  | -  |
| 9   | +  | +  | +  | +  | +  | -  | -  |
| 10  | +  | +  | +  | +  | +  | -  | -  |
| 11  | +  | +  | +  | +  | +  | -  | -  |
| 12  | +  | +  | +  | +  | +  | -  | -  |
| 13  | +  | +  | +  | +  | +  | -  | -  |
| 14  | +  | +  | +  | +  | +  | -  | -  |
| 15  | +  | +  | +  | +  | +  | -  | -  |
| 16  | +  | +  | +  | +  | +  | -  | -  |
| 17  | +  | +  | +  | +  | +  | -  | -  |
| 18  | +  | +  | +  | +  | +  | -  | -  |
| 19  | +  | +  | +  | +  | +  | -  | -  |
| 20  | +  | +  | +  | +  | +  | -  | -  |
| 21  | +  | +  | +  | +  | -  | -  | -  |
| 22  | +  | +  | +  | +  | +  | -  | -  |
| 23  | +  | +  | +  | +  | +  | -  | -  |
| 24  | +  | +  | +  | +  | +  | -  | -  |
| 25  | +  | +  | +  | +  | +  | -  | -  |
| 26  | +  | +  | +  | +  | +  | -  | -  |
| 27  | +  | +  | +  | +  | +  | -  | -  |
| 28  | +  | +  | +  | +  | +  | -  | -  |
| 29  | +  | +  | +  | +  | +  | -  | -  |
| 30  | +  | +  | +  | +  | +  | -  | -  |
| 31  | +  | +  | +  | -  | +  | -  | -  |
| 32  | +  | +  | +  | +  | +  | -  | -  |
| 33  | +  | +  | +  | +  | +  | +  | -  |
| 34  | +  | +  | +  | +  | +  | -  | -  |

S5. RBSP3

A.

GCCCCTGCACACTCACACTGGCTCAGT CGGCACA CGCACTCTGGCAGCCT CGCTCTCCT  
 C CGGGCG CACCCCACACCCACG CACCCTC CGGGCCCTGTGCACCCCTCCCCCAGGCC  
 ATGC CGGCGCC CGGCAGTGA ACTCCAG CGG CGCG GGGTGTG CGCT CGCCCCAGCC C  
 GCGGCCG CCTGCG CCCCTCCTCACCTTTCT CGCC CGCG CC CGGCAAC CGGCCCT CGTC  
 CTCC TTGGGGTTGGTCACCTGGGTGATG

B. Cervical tumor №47

| CpG | C1 | C2 | C3 | C4 | C5 | C6 | C7 |
|-----|----|----|----|----|----|----|----|
| 1   | -  | -  | -  | -  | -  | -  | -  |
| 2   | -  | -  | -  | -  | -  | -  | +  |
| 3   | -  | -  | -  | -  | -  | -  | -  |
| 4   | -  | +  | +  | -  | -  | -  | -  |
| 5   | -  | +  | +  | -  | -  | -  | -  |
| 6   | +  | +  | -  | -  | -  | -  | -  |
| 7   | -  | -  | -  | -  | -  | -  | -  |
| 8   | -  | -  | -  | +  | +  | -  | -  |
| 9   | -  | +  | +  | +  | +  | -  | -  |
| 10  | -  | +  | +  | +  | +  | -  | -  |
| 11  | -  | +  | +  | +  | +  | -  | -  |
| 12  | +  | +  | -  | +  | +  | -  | -  |
| 13  | +  | +  | +  | +  | +  | -  | -  |
| 14  | +  | +  | +  | +  | +  | -  | -  |
| 15  | +  | -  | +  | +  | +  | -  | -  |
| 16  | +  | +  | -  | +  | +  | -  | -  |
| 17  | -  | +  | +  | -  | -  | -  | -  |
| 18  | +  | +  | +  | +  | -  | -  | +  |
| 19  | -  | +  | +  | +  | +  | -  | +  |
| 20  | -  | +  | -  | +  | +  | -  | +  |
| 21  | +  | -  | -  | +  | -  | -  | -  |
| 22  | +  | -  | +  | +  | +  | -  | -  |
| 23  | +  | +  | +  | +  | +  | -  | -  |
